# Supplementary material for: Design, Synthesis, and Evaluation of Novel 2H-Benzo[b][1,4]thiazin-3(4H)-one Derivatives as New Acetylcholinesterase Inhibitors
Source: Molecules. 2022 Mar 25;27(7):2121. doi: 10.3390/molecules27072121 (PMC9000418; doi:10.3390/molecules27072121)

# Design, Synthesis and In Vitro Evaluation of Acetylcholinesterase Inhibitory Activity Of Novel Thiadiazol Derivatives

Sazan Hajiali<sup>1</sup>, Derya Osmaniye<sup>1,2</sup>, Begüm Nurpelin Sağlık<sup>1,2</sup>, Yusuf Özkay<sup>1,2</sup>, Zafer Asım Kaplancıklı<sup>1\*</sup>

<sup>1</sup> Department of Pharmaceutical Chemistry, Faculty of Pharmacy, Anadolu University, 26470 Eskişehir, Turkey

<sup>2</sup> Doping and Narcotic Compounds Analysis Laboratory, Faculty of Pharmacy, Anadolu University, 26470 Eskişehir, Turkey

\*Correspondence:

Prof. Dr. Zafer Asım KAPLANCIKLI, Department of Pharmaceutical Chemistry, Faculty of Pharmacy, Anadolu University, 26470 Eskişehir, Turkey

Email: zakaplan@anadolu.edu.tr

**Citation:** Haji Ali, S.; Osmaniye, D.; Sağlık, B.N.; Levent, S.; Özkay, Y.; Kaplancıklı, Z.A. Design, Synthesis, and Evaluation of Novel 2*H*-Benzo[b][1,4]thiazin-3(4*H*)-one Derivatives as New Acetylcholinesterase Inhibitors. *Molecules* **2022**, *27*, 2121. <https://doi.org/10.3390/molecules27072121>

Academic Editor: Athina Geronikaki

Received: 28 February 2022

Accepted: 22 March 2022

Published: 25 March 2022

**Publisher's Note:** MDPI stays neutral with regard to jurisdictional claims in published maps and institutional affiliations.

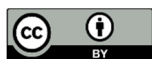

**Copyright:** © 2022 by the authors. Licensee MDPI, Basel, Switzerland. This article is an open access article distributed under the terms and conditions of the Creative Commons Attribution (CC BY) license (<https://creativecommons.org/licenses/by/4.0/>).

## Supplementary Data:

## Figure S1. HRMS of 3a:

Data File: C:\LabSolutions\Data\Analiz\derya\COMP-1\_99.lod

| Elmt | Val. | Min | Max | Use Adduct |
|------|------|-----|-----|------|------|-----|-----|------|------|-----|-----|------|------|-----|-----|------------|
| H    | 1    | 10  | 40  | O    | 2    | 1   | 7   | S    | 2    | 2   | 3   | Ru   | 2    | 0   | 0   | H          |
| C    | 4    | 10  | 40  | F    | 1    | 0   | 0   | Cl   | 1    | 0   | 0   | Pd   | 2    | 0   | 0   |            |
| N    | 3    | 2   | 7   | P    | 3    | 0   | 0   | Br   | 1    | 0   | 1   | I    | 3    | 0   | 0   |            |

Error Margin (ppm): 10

HC Ratio: unlimited

Max Isotopes: 3

MSn Iso RI (%): 10.00

DBE Range: 10.0 - 25.0

Apply N Rule: yes

Isotope RI (%): 1.00

MSn Logic Mode: AND

Electron Ions: both

Use MSn Info: yes

Isotope Res: 9000

Max Results: 150

Event#: 1 MS(E+) Ret. Time : 3.467 Scan#: 521

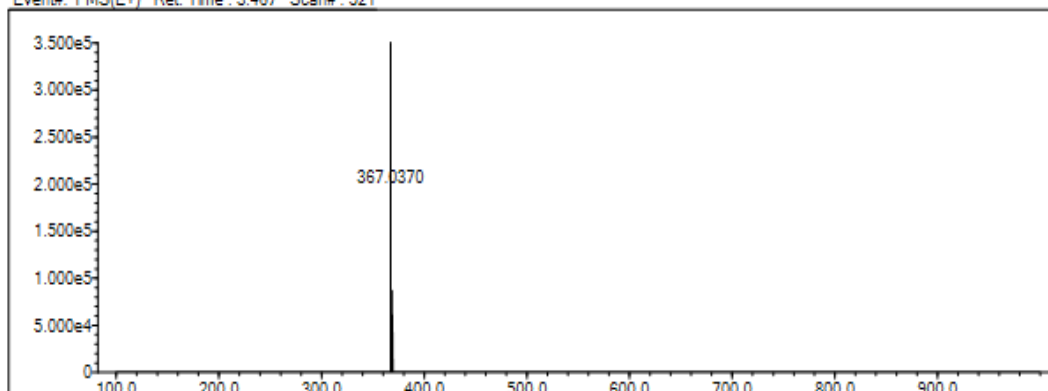

Measured region for 367.0370 m/z

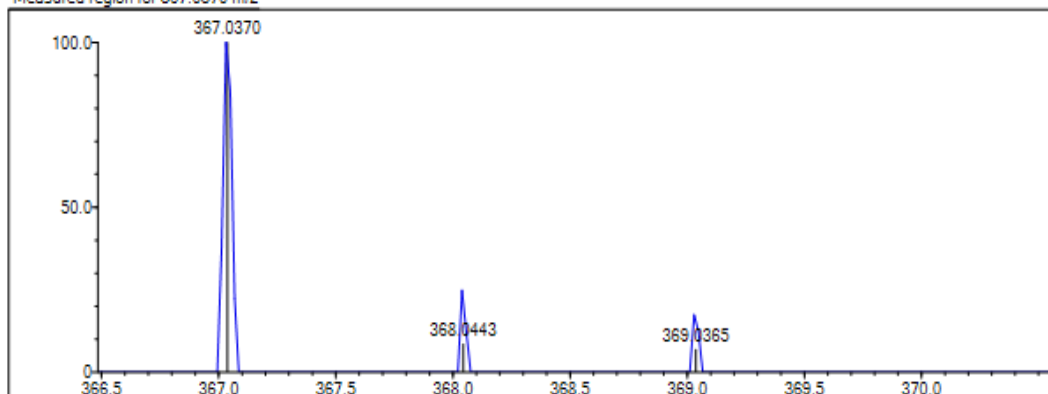C14 H14 N4 O2 S3 [M+H]<sup>+</sup>: Predicted region for 367.0352 m/z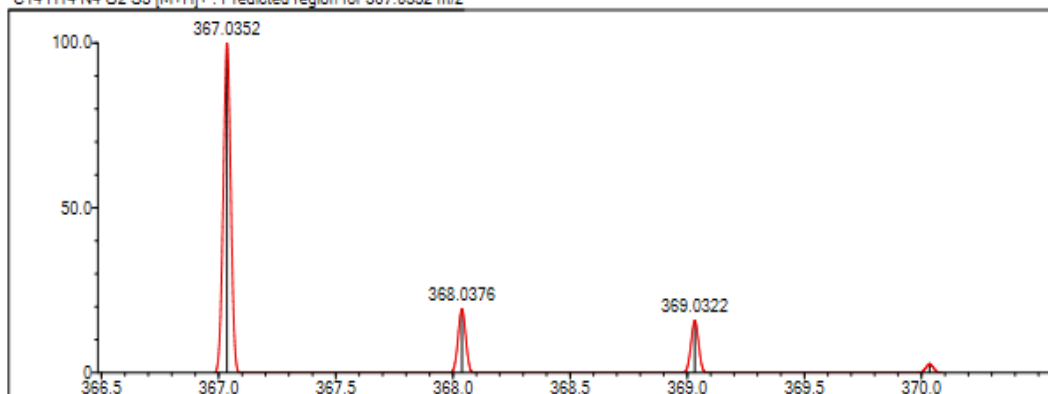

| Rank | Score | Formula (M)      | Ion                | Meas. m/z | Pred. m/z | Df. (mDa) | Df. (ppm) | Iso   | DBE  |
|------|-------|------------------|--------------------|-----------|-----------|-----------|-----------|-------|------|
| 1    | 58.68 | C14 H14 N4 O2 S3 | [M+H] <sup>+</sup> | 367.0370  | 367.0352  | 1.8       | 4.90      | 65.02 | 10.0 |

Figure S2. HRMS of 3b:

Data File: C:\LabSolutions\Data\Analiz\data\COMP-3\_103.lcd

| Elmt | Val | Min | Max | Use Adduct |
|------|-----|-----|-----|------|-----|-----|-----|------|-----|-----|-----|------|-----|-----|-----|------------|
| H    | 1   | 10  | 40  | O    | 2   | 2   | 5   | S    | 2   | 1   | 3   | Ru   | 2   | 0   | 0   | H          |
| C    | 4   | 10  | 40  | F    | 1   | 0   | 0   | Cl   | 1   | 0   | 0   | Pd   | 2   | 0   | 0   |            |
| N    | 3   | 2   | 7   | P    | 3   | 0   | 0   | Br   | 1   | 0   | 0   | I    | 3   | 0   | 0   |            |

Error Margin (ppm): 5  
 HC Ratio: unlimited  
 Max Isotopes: 3  
 MSn Iso RI (%): 10.00

DBE Range: 5.0 - 25.0  
 Apply N Rule: yes  
 Isotope RI (%): 1.00  
 MSn Logic Mode: AND

Electron Ions: both  
 Use MSn Info: yes  
 Isotope Res: 9000  
 Max Results: 150

Event#: 1 MS(E+) Ret. Time : 3.520 Scan#: 529

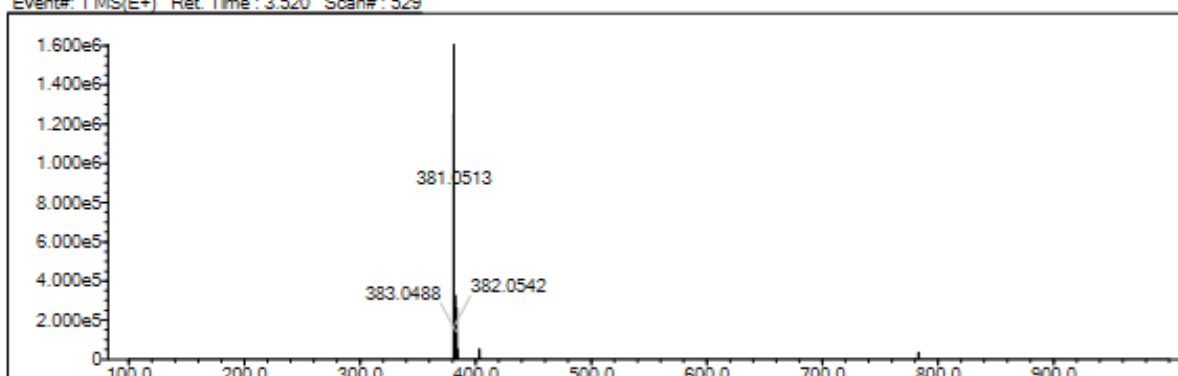

Measured region for 381.0513 m/z

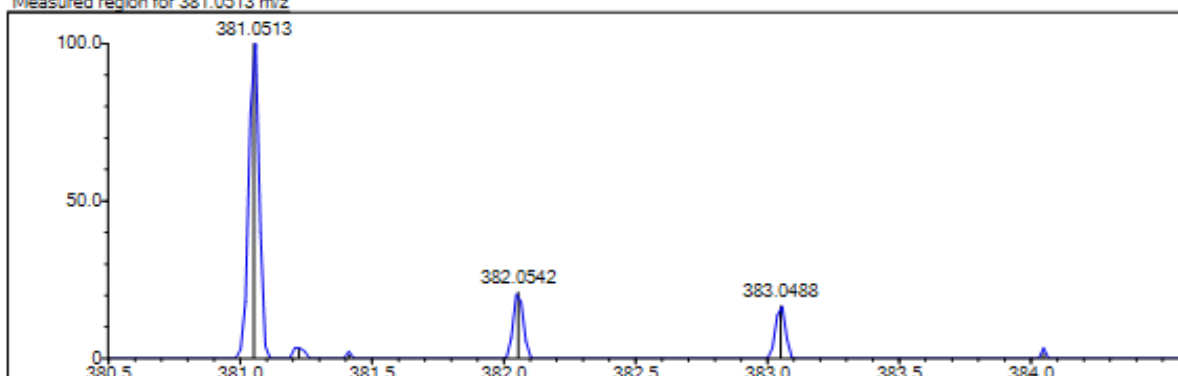C15 H16 N4 O2 S3 [M+H]<sup>+</sup> : Predicted region for 381.0508 m/z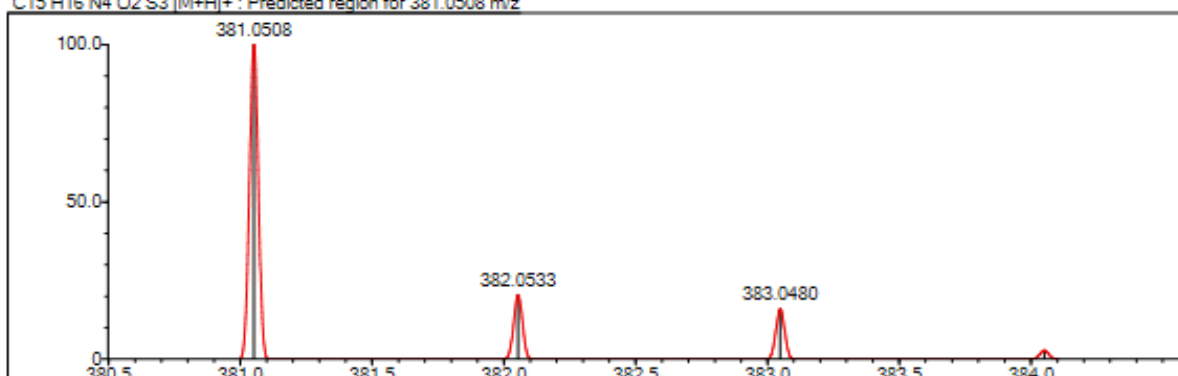

| Rank | Score | Formula (M)      | Ion                | Meas. m/z | Pred. m/z | Df. (mDa) | Df. (ppm) | Iso   | DBE  |
|------|-------|------------------|--------------------|-----------|-----------|-----------|-----------|-------|------|
| 1    | 88.22 | C15 H16 N4 O2 S3 | [M+H] <sup>+</sup> | 381.0513  | 381.0508  | 0.5       | 1.31      | 88.91 | 10.0 |

Figure S3. HRMS of 3c:

Data File: C:\LabSolutions\Data\Analysis\Comp-4\_102.lcd

| Elmt | Val | Min | Max | Use Adduct |
|------|-----|-----|-----|------|-----|-----|-----|------|-----|-----|-----|------|-----|-----|-----|------------|
| H    | 1   | 10  | 40  | O    | 2   | 1   | 7   | S    | 2   | 2   | 3   | Ru   | 2   | 0   | 0   | H          |
| C    | 4   | 10  | 40  | F    | 1   | 0   | 0   | Cl   | 1   | 0   | 0   | Pd   | 2   | 0   | 0   |            |
| N    | 3   | 2   | 7   | P    | 3   | 0   | 0   | Br   | 1   | 0   | 1   | I    | 3   | 0   | 0   |            |

Error Margin (ppm): 10  
 HC Ratio: unlimited  
 Max Isotopes: 3  
 MSn Iso RI (%): 10.00

DBE Range: 10.0 - 25.0  
 Apply N Rule: yes  
 Isotope RI (%): 1.00  
 MSn Logic Mode: AND

Electron Ions: both  
 Use MSn Info: yes  
 Isotope Res: 9000  
 Max Results: 150

Event#: 1 MS(E+) Ret. Time : 3.747 Scan# : 563

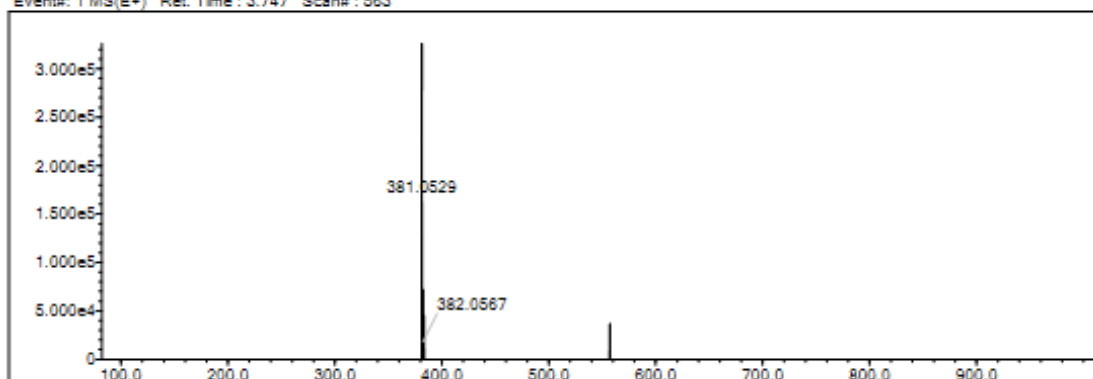

Measured region for 381.0529 m/z

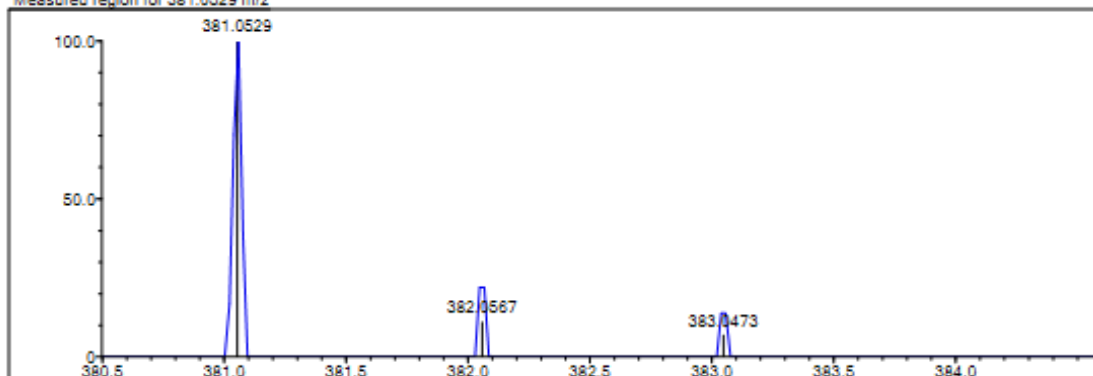C15 H16 N4 O2 S3 [M+H]<sup>+</sup> : Predicted region for 381.0508 m/z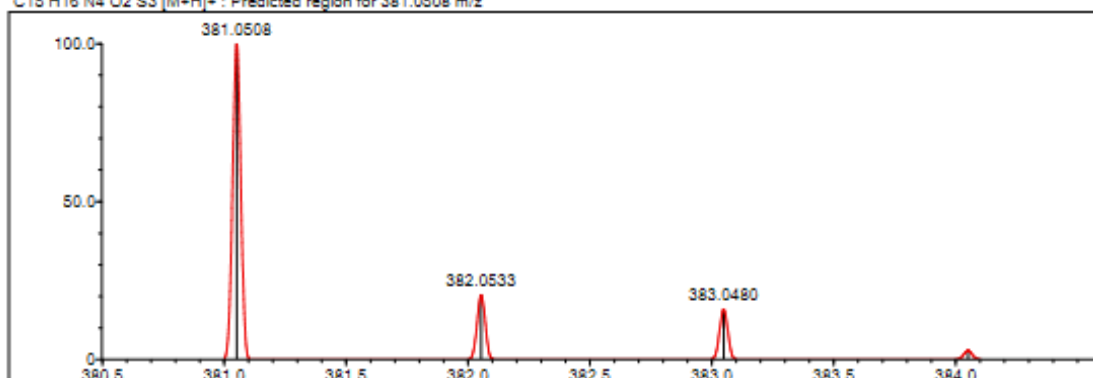

| Rank | Score | Formula (M)      | Ion                | Meas. m/z | Pred. m/z | Df. (mDa) | Df. (ppm) | Iso   | DBE  |
|------|-------|------------------|--------------------|-----------|-----------|-----------|-----------|-------|------|
| 1    | 52.99 | C15 H16 N4 O2 S3 | [M+H] <sup>+</sup> | 381.0529  | 381.0508  | 2.1       | 5.51      | 62.42 | 10.0 |

Figure S4. HRMS of 3d:

Data File: C:\LabSolutions\Data\Analiz\deriv\COMP-5\_2\_176.lcd

| Elmt | Val. | Min | Max | Use Adduct |
|------|------|-----|-----|------|------|-----|-----|------|------|-----|-----|------|------|-----|-----|------------|
| H    | 1    | 10  | 40  | O    | 2    | 0   | 3   | S    | 2    | 1   | 3   | Ru   | 2    | 0   | 0   | H          |
| C    | 4    | 10  | 40  | F    | 1    | 0   | 0   | Cl   | 1    | 0   | 0   | Pd   | 2    | 0   | 0   |            |
| N    | 3    | 3   | 7   | P    | 3    | 0   | 0   | Br   | 1    | 0   | 0   | I    | 3    | 0   | 0   |            |

Error Margin (ppm): 5

HC Ratio: unlimited

Max Isotopes: 3

MSn Iso RI (%): 10.00

DBE Range: 5.0 - 20.0

Apply N Rule: yes

Isotope RI (%): 1.00

MSn Logic Mode: AND

Electron Ions: both

Use MSn Info: yes

Isotope Res: 9000

Max Results: 150

Event#: 1 MS(E+) Ret. Time : 2.613 Scan#: 393

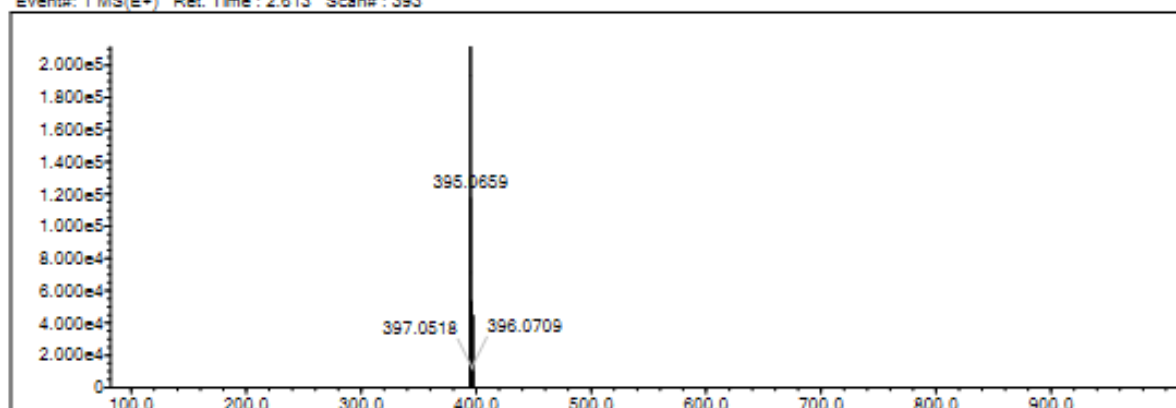

Measured region for 395.0659 m/z

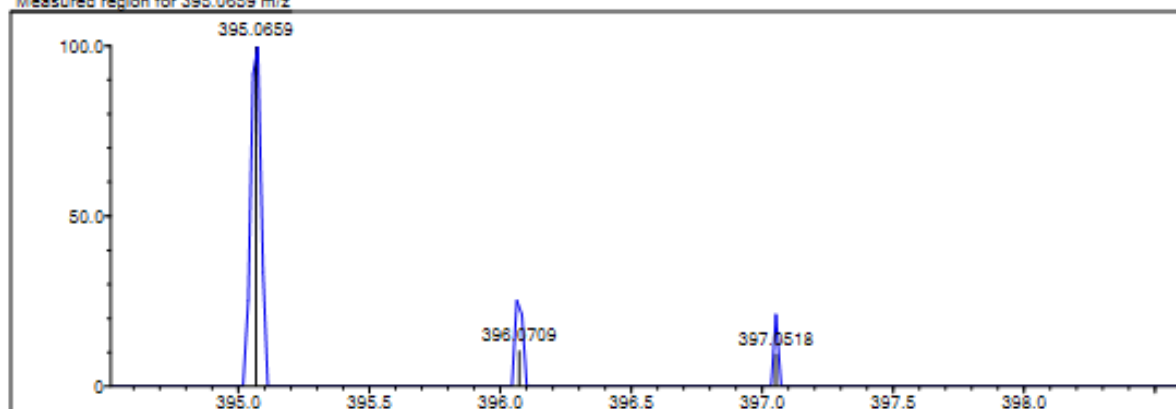C16 H18 N4 O2 S3 [M+H]<sup>+</sup> : Predicted region for 395.0665 m/z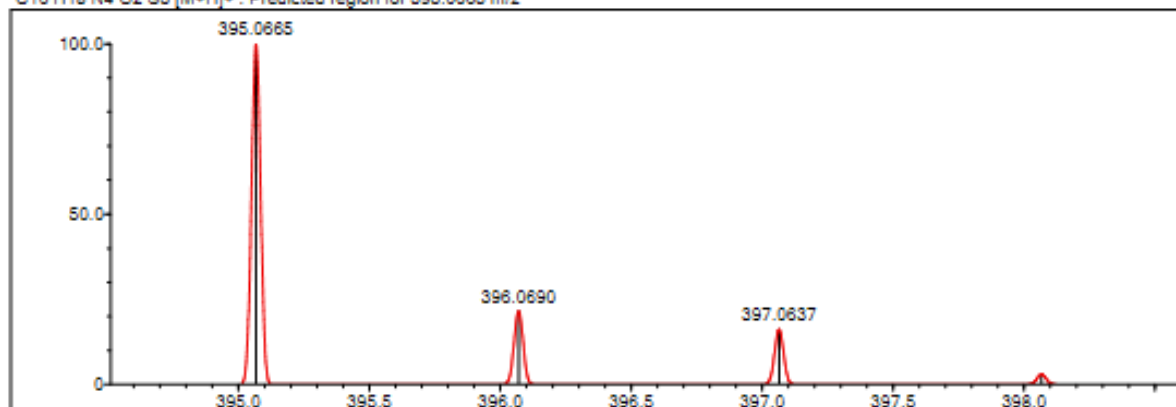

| Rank | Score | Formula (M)      | Ion                | Meas. m/z | Pred. m/z | Df. (mDa) | Df. (ppm) | Iso   | DBE  |
|------|-------|------------------|--------------------|-----------|-----------|-----------|-----------|-------|------|
| 1    | 46.37 | C16 H18 N4 O2 S3 | [M+H] <sup>+</sup> | 395.0659  | 395.0665  | -0.6      | -1.52     | 46.98 | 10.0 |

Figure S5. HRMS of 3e:

Data File: C:\LabSolutions\Data\Analiz\derys\COMP-6\_106.lcd

| Elmt | Val. | Min | Max | Use Adduct |
|------|------|-----|-----|------|------|-----|-----|------|------|-----|-----|------|------|-----|-----|------------|
| H    | 1    | 10  | 40  | O    | 2    | 2   | 5   | S    | 2    | 1   | 3   | Ru   | 2    | 0   | 0   | H          |
| C    | 4    | 10  | 40  | F    | 1    | 0   | 0   | Cl   | 1    | 0   | 0   | Pd   | 2    | 0   | 0   |            |
| N    | 3    | 2   | 7   | P    | 3    | 0   | 0   | Br   | 1    | 0   | 0   | I    | 3    | 0   | 0   |            |

Error Margin (ppm): 5

DBE Range: 5.0 - 25.0

Electron Ions: both

HC Ratio: unlimited

Apply N Rule: yes

Use MSn Info: yes

Max Isotopes: 3

Isotope RI (%): 1.00

Isotope Res: 9000

MSn Iso RI (%): 10.00

MSn Logic Mode: AND

Max Results: 150

Event#: 1 MS(E+) Ret. Time: 3.747 Scan#: 563

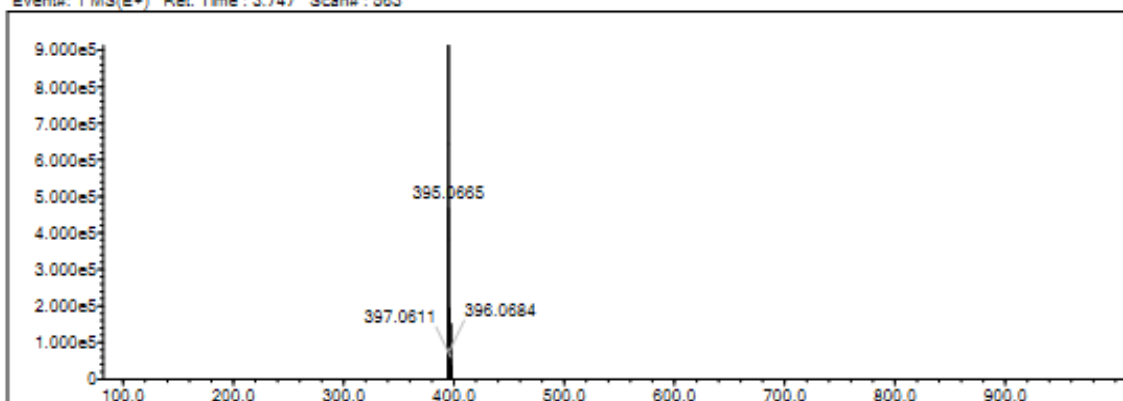

Measured region for 395.0665 m/z

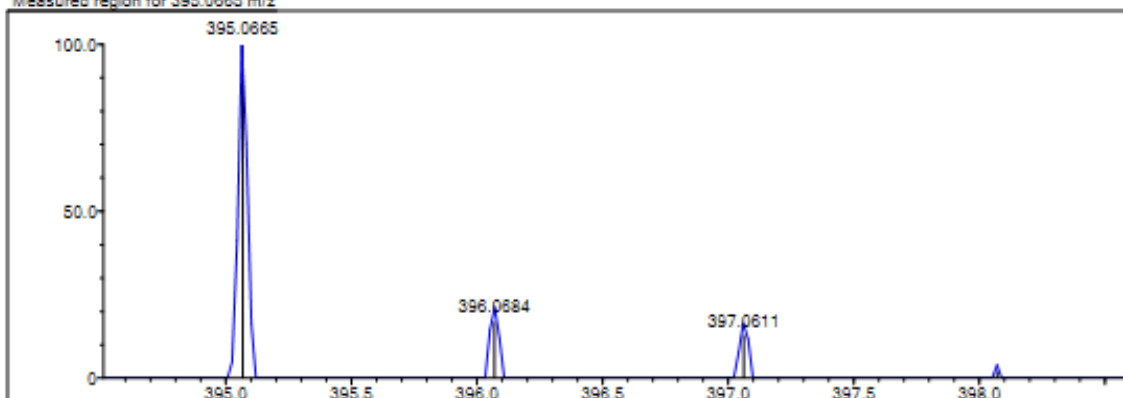C16 H18 N4 O2 S3 [M+H]<sup>+</sup>: Predicted region for 395.0665 m/z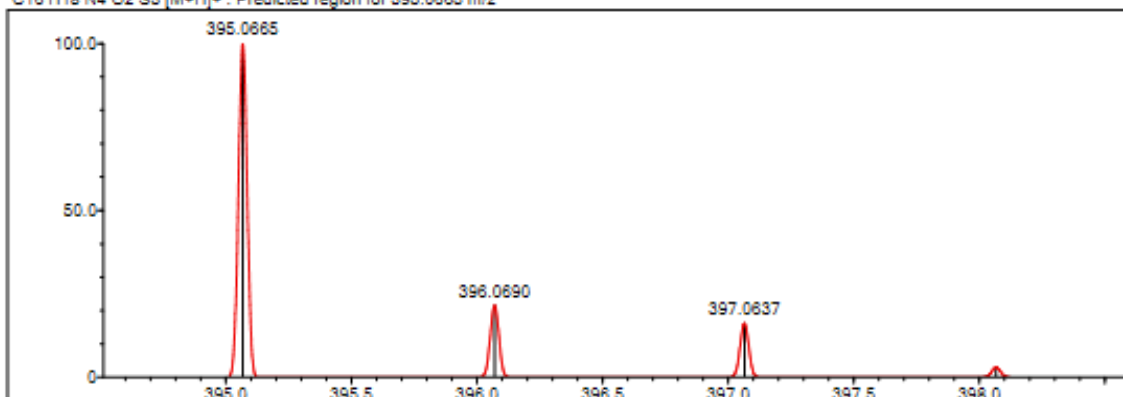

| Rank | Score | Formula (M)      | Ion                | Meas. m/z | Pred. m/z | Df. (mDa) | Df. (ppm) | Iso   | DBE  |
|------|-------|------------------|--------------------|-----------|-----------|-----------|-----------|-------|------|
| 1    | 85.40 | C16 H18 N4 O2 S3 | [M+H] <sup>+</sup> | 395.0665  | 395.0665  | 0.0       | 0.00      | 85.40 | 10.0 |

Figure S6. HRMS of 3f:

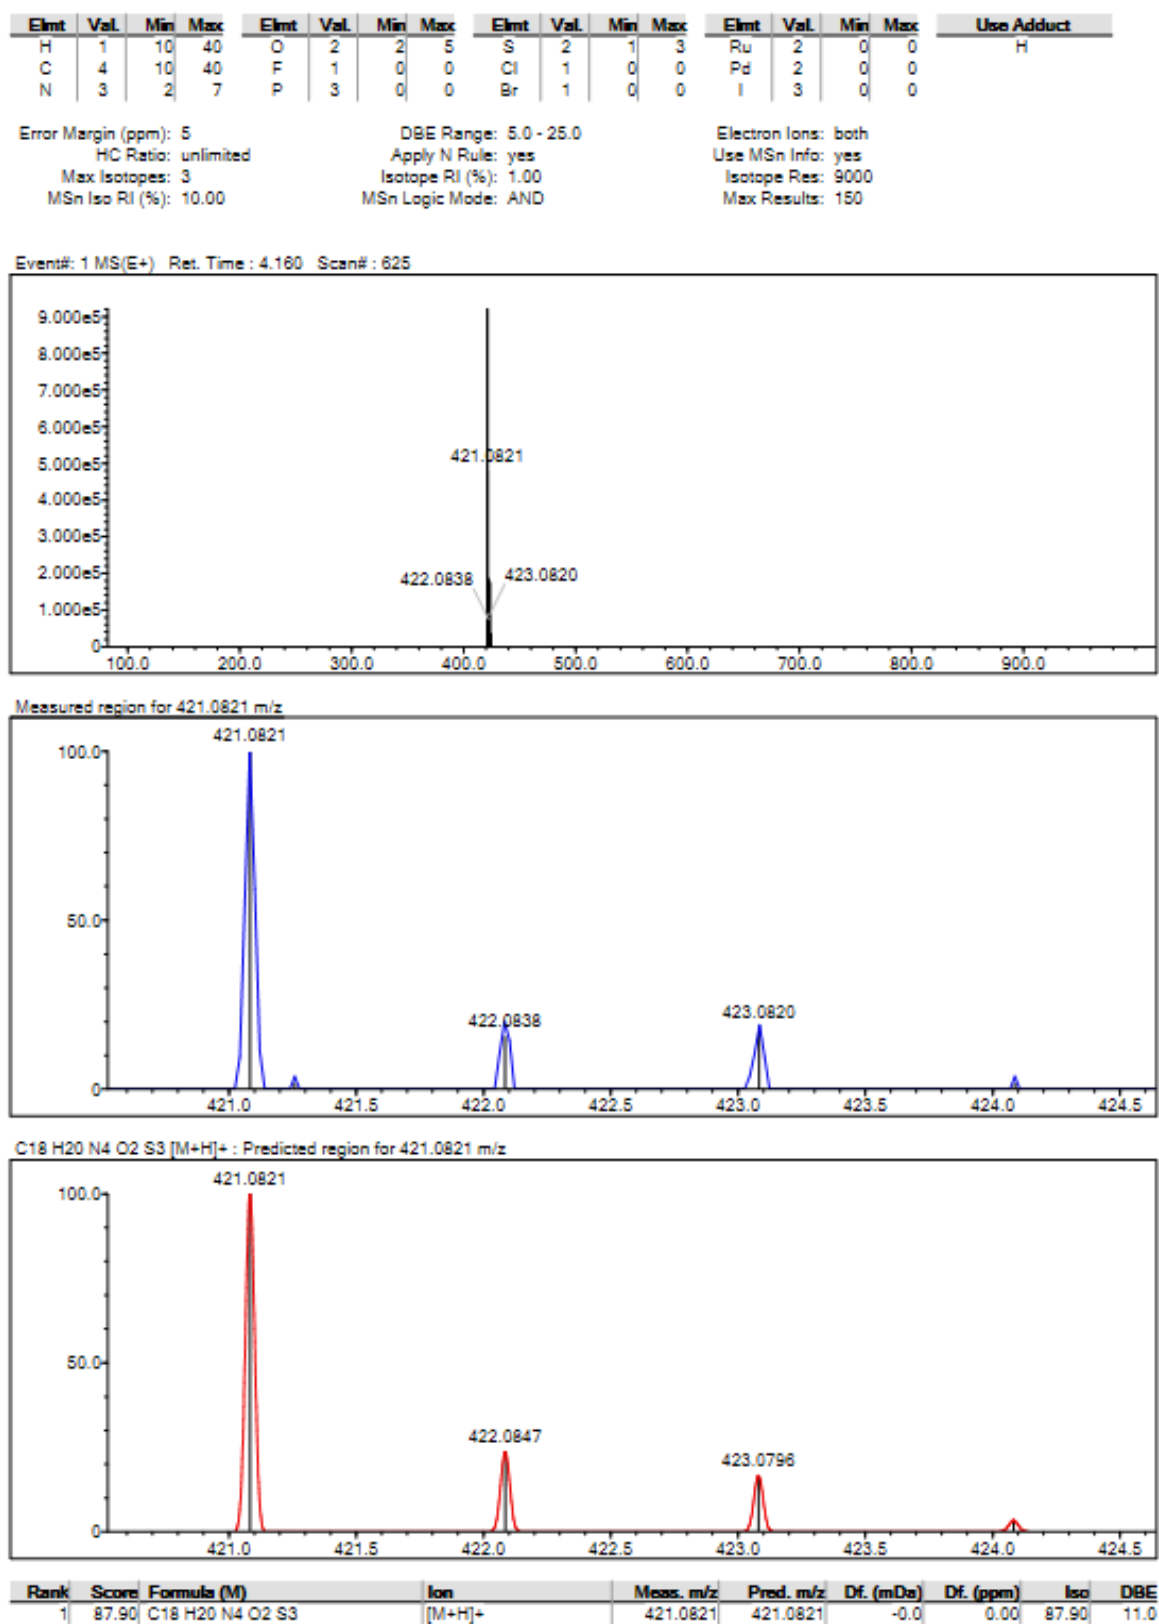

Figure S7. HRMS of 3g:

Data File: C:\LabSolutions\Data\Analiz\data\COMP-8\_108.lcd

| Elmt | Val. | Min | Max | Use Adduct |
|------|------|-----|-----|------|------|-----|-----|------|------|-----|-----|------|------|-----|-----|------------|
| H    | 1    | 10  | 40  | O    | 2    | 2   | 5   | S    | 2    | 1   | 3   | Ru   | 2    | 0   | 0   | H          |
| C    | 4    | 10  | 40  | F    | 1    | 0   | 0   | Cl   | 1    | 0   | 0   | Pd   | 2    | 0   | 0   |            |
| N    | 3    | 2   | 7   | P    | 3    | 0   | 0   | Br   | 1    | 0   | 0   | I    | 3    | 0   | 0   |            |

Error Margin (ppm): 5  
 HC Ratio: unlimited  
 Max Isotopes: 3  
 MSn Iso RI (%): 10.00

DBE Range: 5.0 - 25.0  
 Apply N Rule: yes  
 Isotope RI (%): 1.00  
 MSn Logic Mode: AND

Electron Ions: both  
 Use MSn Info: yes  
 Isotope Res: 9000  
 Max Results: 150

Event#: 1 MS(E+) Ret. Time : 3.853 Scan#: 579

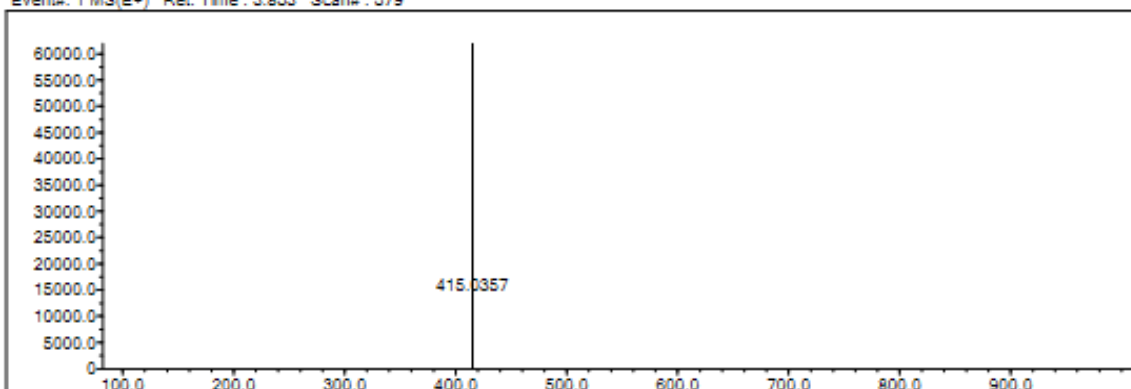

Measured region for 415.0357 m/z

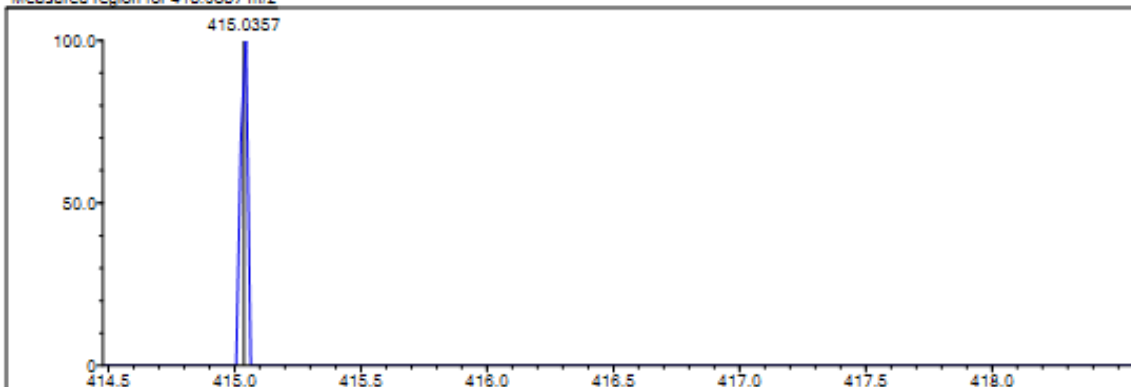C18 H14 N4 O2 S3 [M+H]<sup>+</sup> : Predicted region for 415.0352 m/z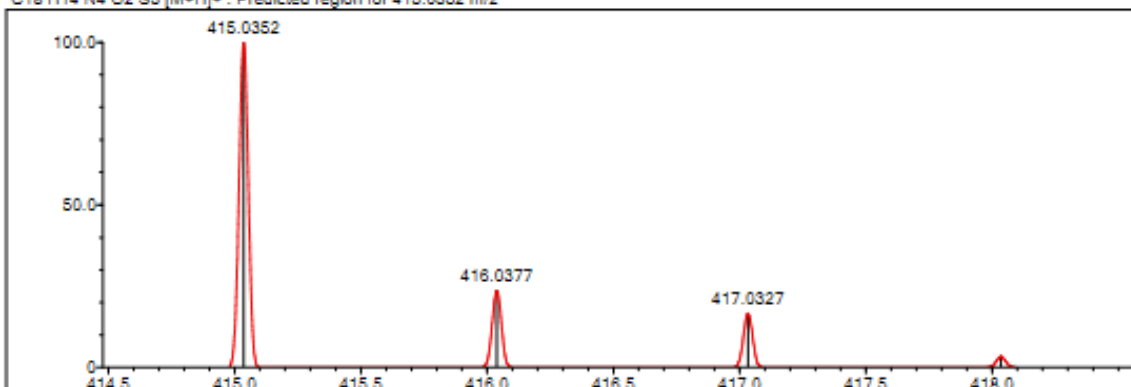

| Rank | Score | Formula (M)      | Ion                | Mass. m/z | Pred. m/z | Df. (mDa) | Df. (ppm) | Iso  | DBE  |
|------|-------|------------------|--------------------|-----------|-----------|-----------|-----------|------|------|
| 1    | 0.00  | C18 H14 N4 O2 S3 | [M+H] <sup>+</sup> | 415.0357  | 415.0352  | 0.5       | 1.20      | 0.00 | 14.0 |

Figure S8. HRMS of 3h:

Data File: C:\LabSolutions\Data\Analiz\derya\COMP-9\_109.lcd

| Elmt | Val. | Min | Max | Use Adduct |
|------|------|-----|-----|------|------|-----|-----|------|------|-----|-----|------|------|-----|-----|------------|
| H    | 1    | 10  | 40  | O    | 2    | 2   | 5   | S    | 2    | 1   | 3   | Ru   | 2    | 0   | 0   | H          |
| C    | 4    | 10  | 40  | F    | 1    | 0   | 0   | Cl   | 1    | 0   | 0   | Pd   | 2    | 0   | 0   |            |
| N    | 3    | 2   | 7   | P    | 3    | 0   | 0   | Br   | 1    | 0   | 0   | I    | 3    | 0   | 0   |            |

Error Margin (ppm): 5

HC Ratio: unlimited

Max Isotopes: 3

MSn Iso RI (%): 10.00

DBE Range: 5.0 - 25.0

Apply N Rule: yes

Isotope RI (%): 1.00

MSn Logic Mode: AND

Electron Ions: both

Use MSn Info: yes

Isotope Res: 9000

Max Results: 150

Event#: 1 MS(E+) Ret. Time : 4.027 -&gt; 4.560 Scan#: 605 -&gt; 685

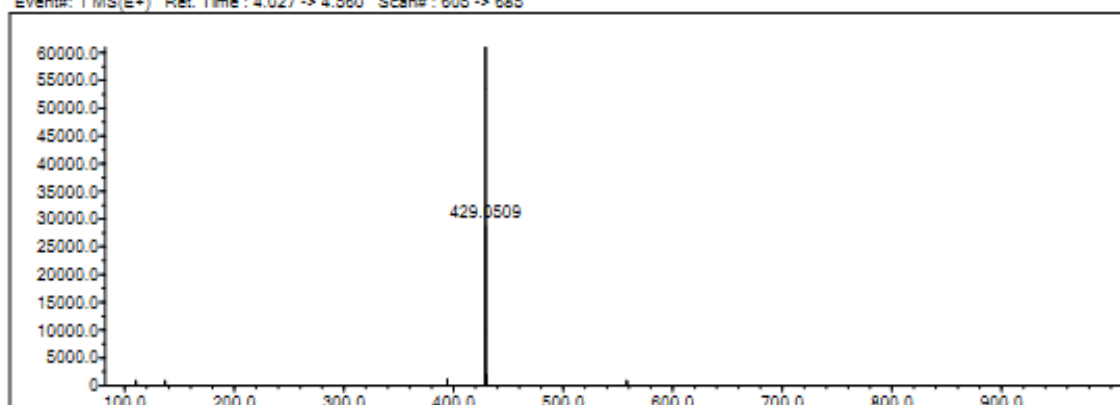

Measured region for 429.0509 m/z

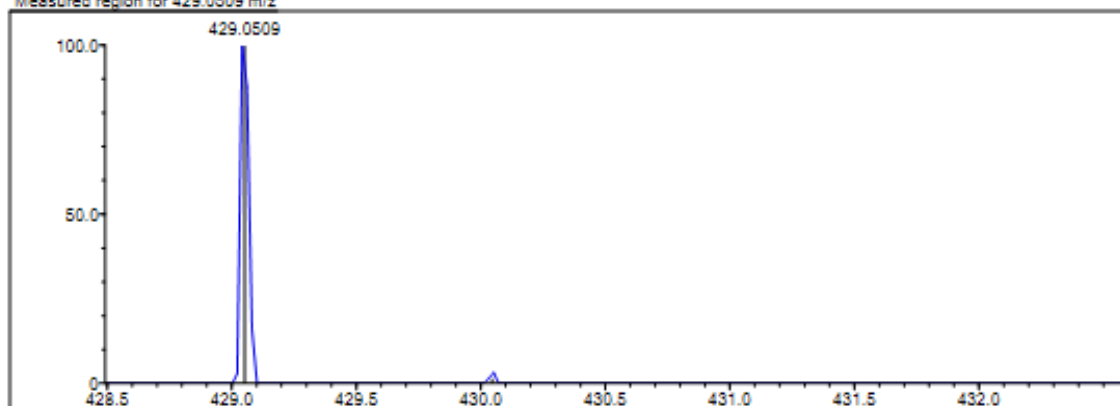C19 H16 N4 O2 S3 [M+H]<sup>+</sup> : Predicted region for 429.0508 m/z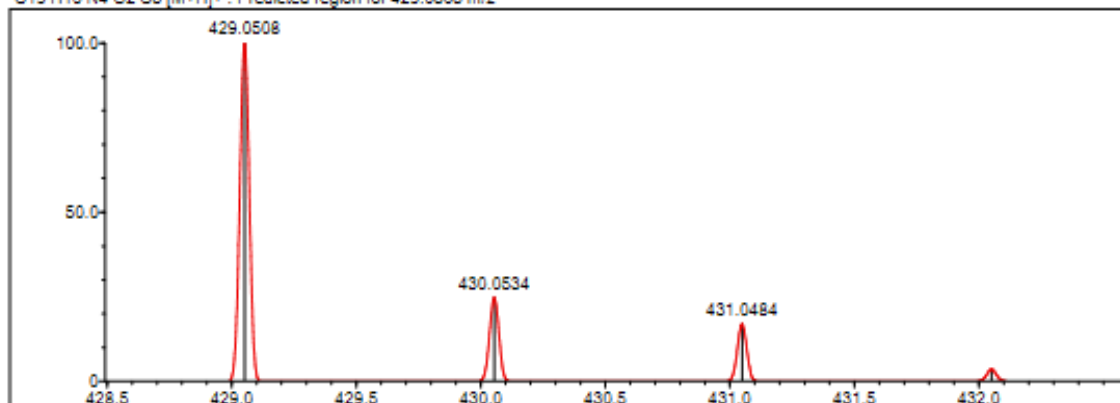

| Rank | Score | Formula (M)      | Ion                | Meas. m/z | Pred. m/z | Df. (mDa) | Df. (ppm) | Iso  | DBE  |
|------|-------|------------------|--------------------|-----------|-----------|-----------|-----------|------|------|
| 1    | 0.00  | C19 H16 N4 O2 S3 | [M+H] <sup>+</sup> | 429.0509  | 429.0508  | 0.1       | 0.23      | 0.00 | 14.0 |

Figure S9. HRMS of 3i:

Data File: C:\LabSolutions\Data\Analiz\iderya\COMP-10\_111.lod

| Elmt | Val. | Min | Max | Use Adduct |
|------|------|-----|-----|------|------|-----|-----|------|------|-----|-----|------|------|-----|-----|------------|
| H    | 1    | 10  | 40  | O    | 2    | 0   | 3   | S    | 2    | 1   | 3   | Ru   | 2    | 0   | 0   | H          |
| C    | 4    | 10  | 40  | F    | 1    | 0   | 0   | Cl   | 1    | 0   | 0   | Pd   | 2    | 0   | 0   |            |
| N    | 3    | 3   | 7   | P    | 3    | 0   | 0   | Br   | 1    | 0   | 0   | I    | 3    | 0   | 0   |            |

Error Margin (ppm): 5  
 HC Ratio: unlimited  
 Max Isotopes: 3  
 MSn Iso RI (%): 10.00

DBE Range: 5.0 - 20.0  
 Apply N Rule: yes  
 Isotope RI (%): 1.00  
 MSn Logic Mode: AND

Electron Ions: both  
 Use MSn Info: yes  
 Isotope Res: 9000  
 Max Results: 150

Event#: 1 MS(E+) Ret. Time : 3.507 -&gt; 3.840 Scan#: 527 -&gt; 577

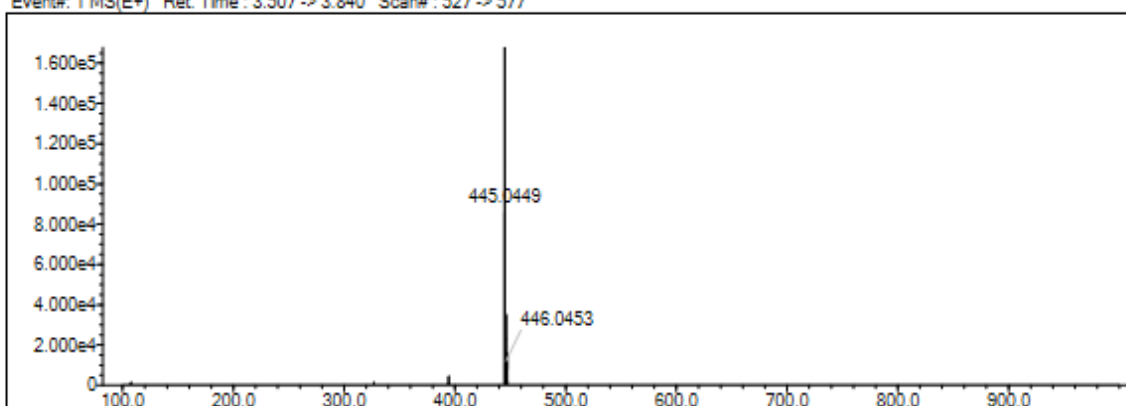

Measured region for 445.0449 m/z

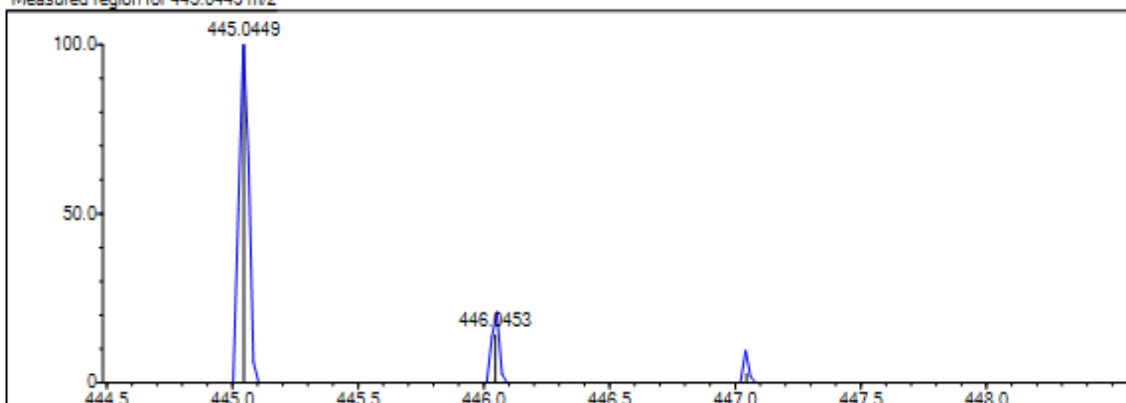C19 H16 N4 O3 S3 [M+H]<sup>+</sup>: Predicted region for 445.0457 m/z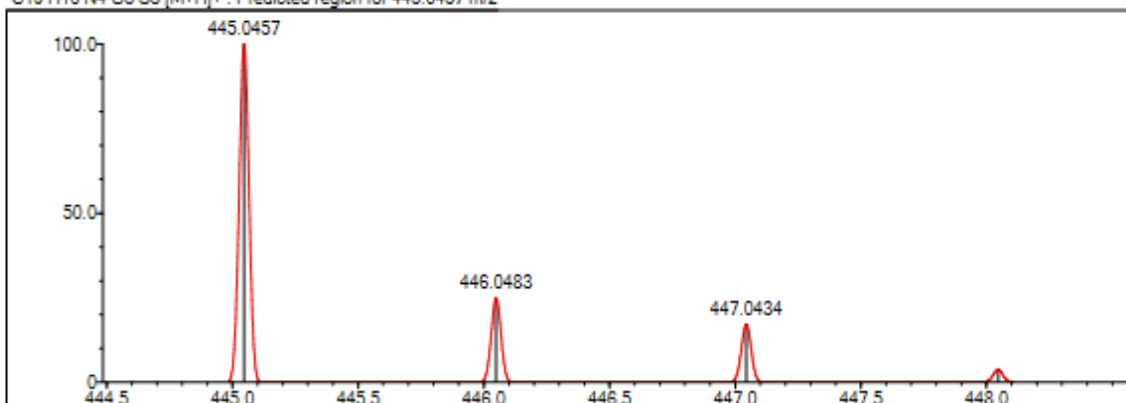

| Rank | Score | Formula (M)      | Ion                | Meas. m/z | Pred. m/z | Df. (mDa) | Df. (ppm) | Iso   | DBE  |
|------|-------|------------------|--------------------|-----------|-----------|-----------|-----------|-------|------|
| 1    | 67.37 | C19 H16 N4 O3 S3 | [M+H] <sup>+</sup> | 445.0449  | 445.0457  | -0.8      | -1.80     | 68.75 | 14.0 |

Figure S10. HRMS of 3j:

Data File: C:\LabSolutions\Data\Analiz\derya\COMP-11\_1.lod

| Elmt | Val. | Min | Max | Use Adduct |
|------|------|-----|-----|------|------|-----|-----|------|------|-----|-----|------|------|-----|-----|------------|
| H    | 1    | 5   | 40  | O    | 2    | 0   | 4   | S    | 2    | 0   | 3   | Ru   | 2    | 0   | 0   | H          |
| C    | 4    | 5   | 30  | F    | 1    | 0   | 0   | Cl   | 1    | 0   | 1   | Pd   | 2    | 0   | 0   |            |
| N    | 3    | 0   | 6   | P    | 3    | 0   | 0   | Br   | 1    | 0   | 0   | I    | 3    | 0   | 0   |            |

Error Margin (ppm): 5  
 HC Ratio: unlimited  
 Max Isotopes: 3  
 MSn Iso RI (%): 10.00

DBE Range: 5.0 - 17.0  
 Apply N Rule: yes  
 Isotope RI (%): 1.00  
 MSn Logic Mode: AND

Electron Ions: both  
 Use MSn Info: yes  
 Isotope Res: 9000  
 Max Results: 200

Event#: 1 MS(E+) Ret. Time : 3.227 -&gt; 3.333 Scan#: 485 -&gt; 501

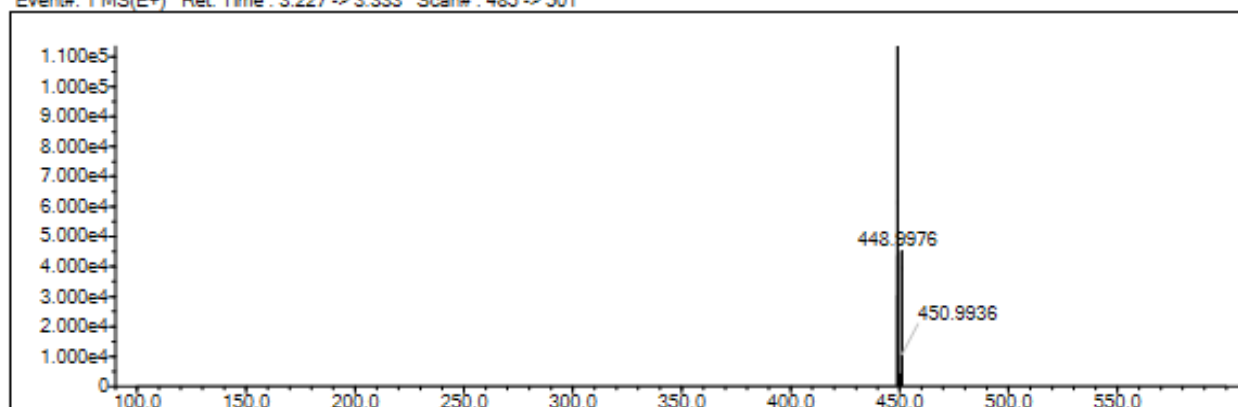

Measured region for 448.9976 m/z

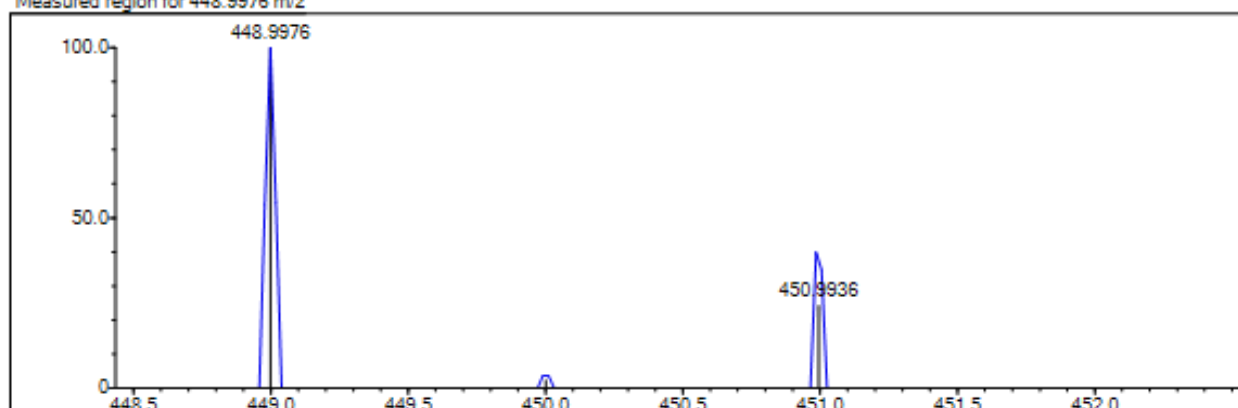C18 H13 N4 O2 S3 Cl [M+H]<sup>+</sup>: Predicted region for 448.9962 m/z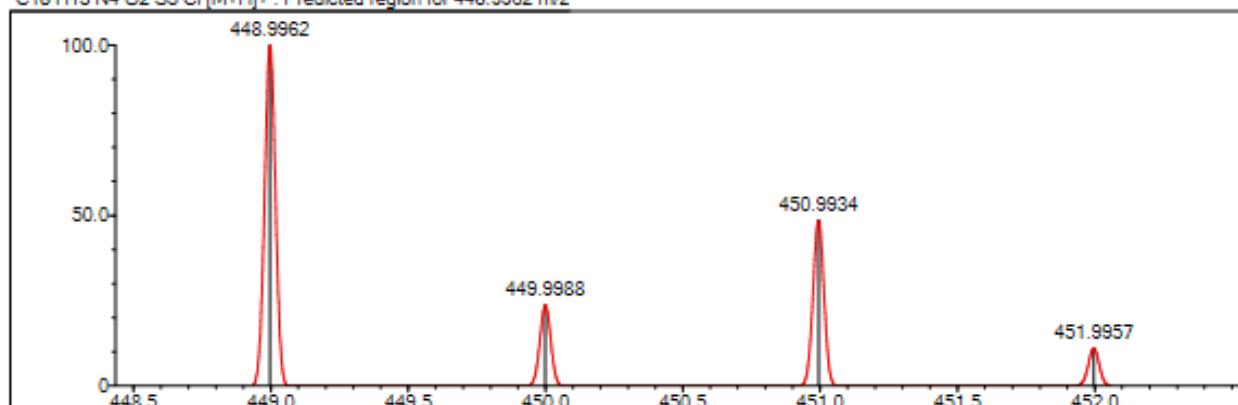

| Rank | Score | Formula (M)         | Ion                | Meas. m/z | Pred. m/z | Df. (mDa) | Df. (ppm) | Iso   | DBE  |
|------|-------|---------------------|--------------------|-----------|-----------|-----------|-----------|-------|------|
| 1    | 50.91 | C18 H13 N4 O2 S3 Cl | [M+H] <sup>+</sup> | 448.9976  | 448.9962  | 1.4       | 3.12      | 53.75 | 14.0 |

**<sup>1</sup>HNMR of Compound 3a-3j:****Figure S11. <sup>1</sup>HNMR 3a:**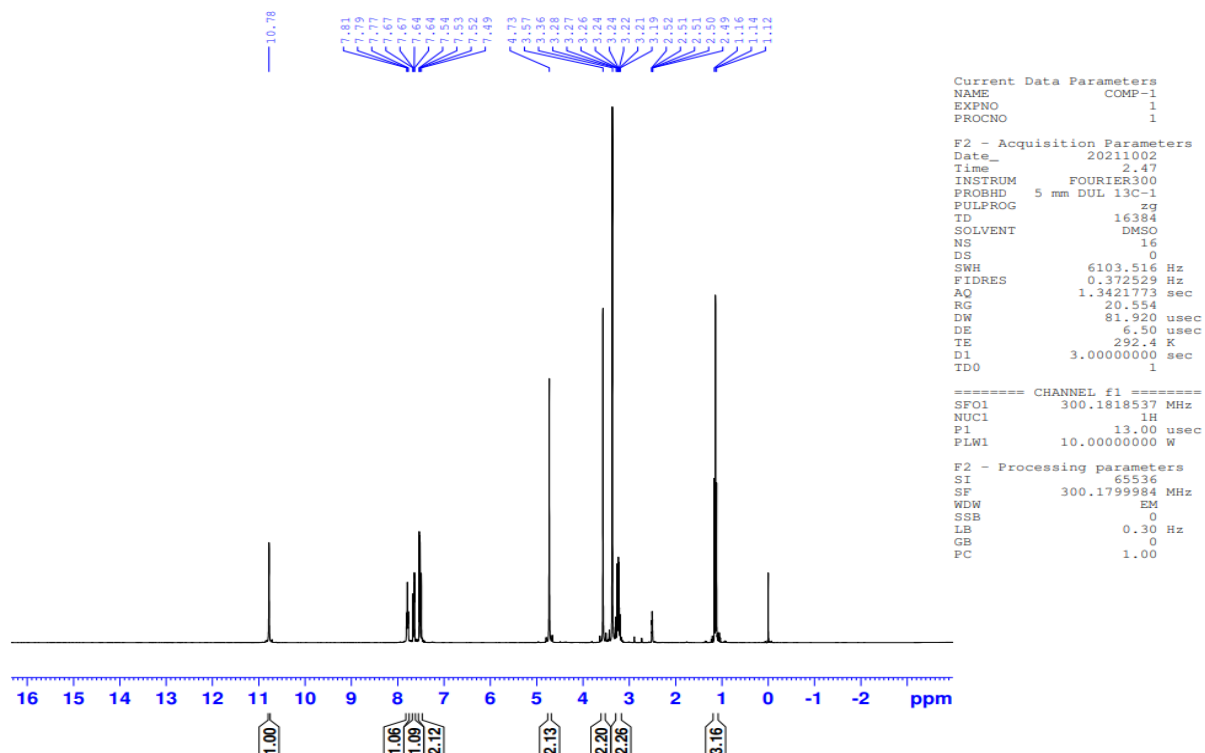**Figure S12. <sup>1</sup>HNMR 3b:**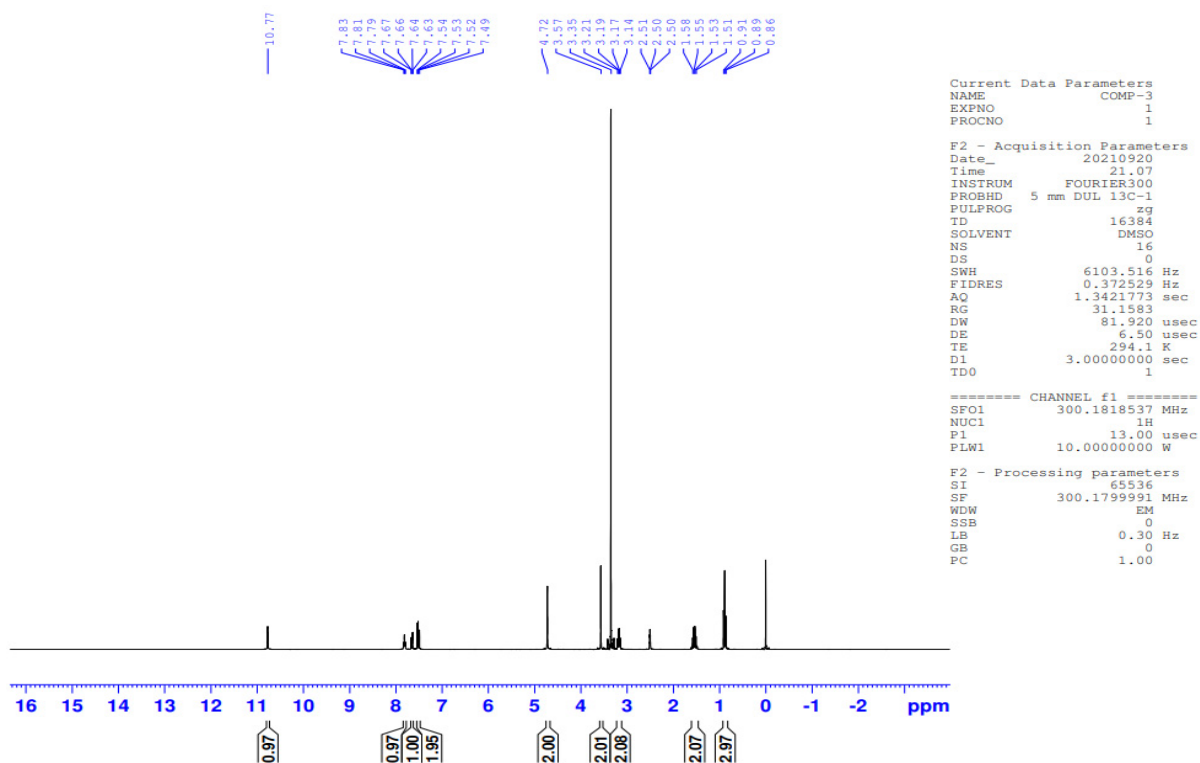

Figure S13.  $^1\text{H}$ NMR 3c: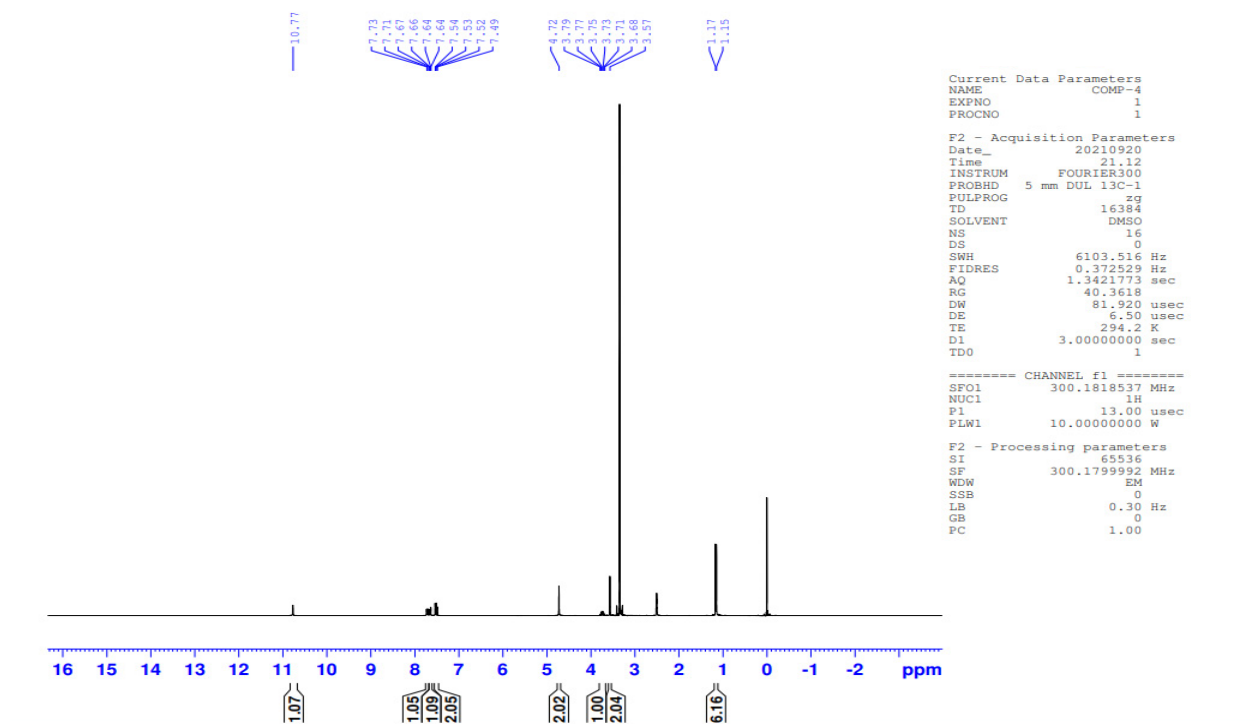Figure S14.  $^1\text{H}$ NMR 3d: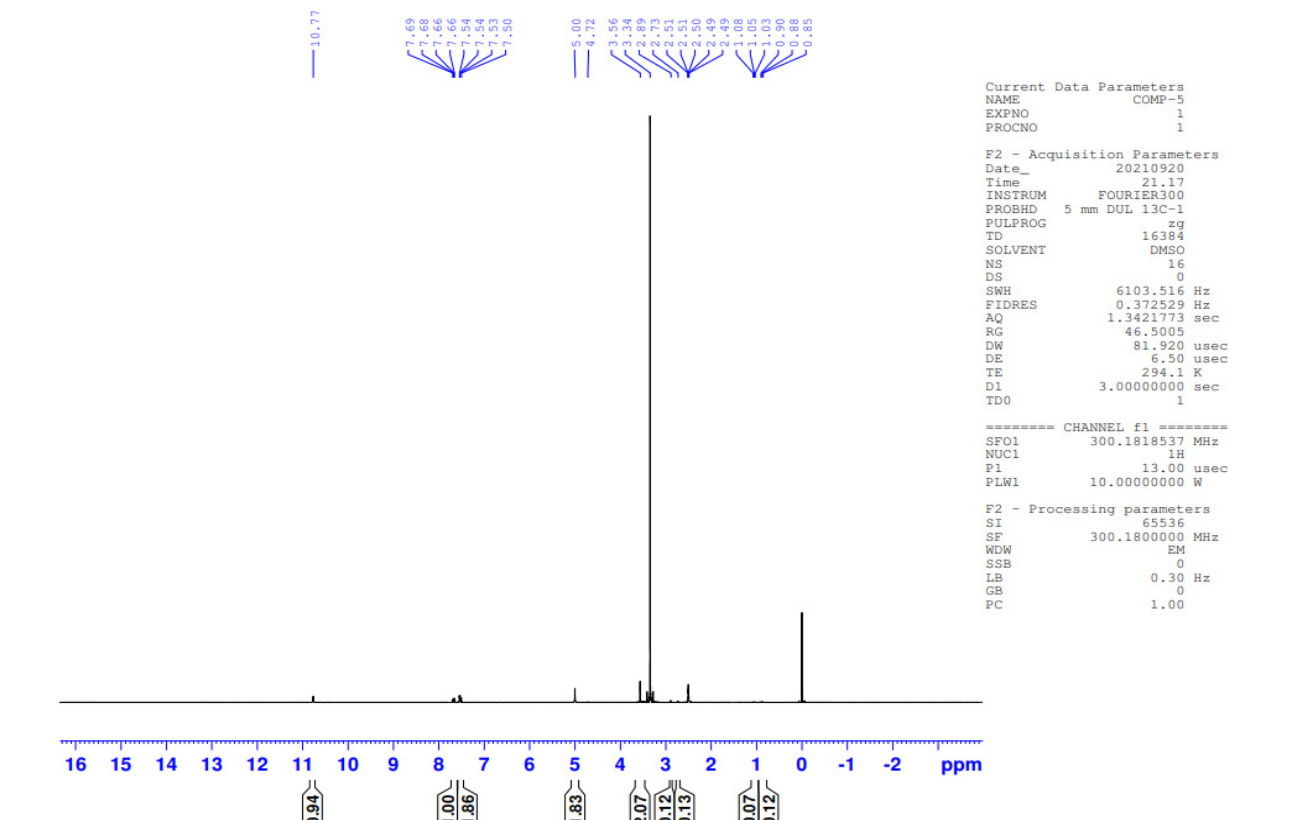

Figure S15. <sup>1</sup>HNMR 3e: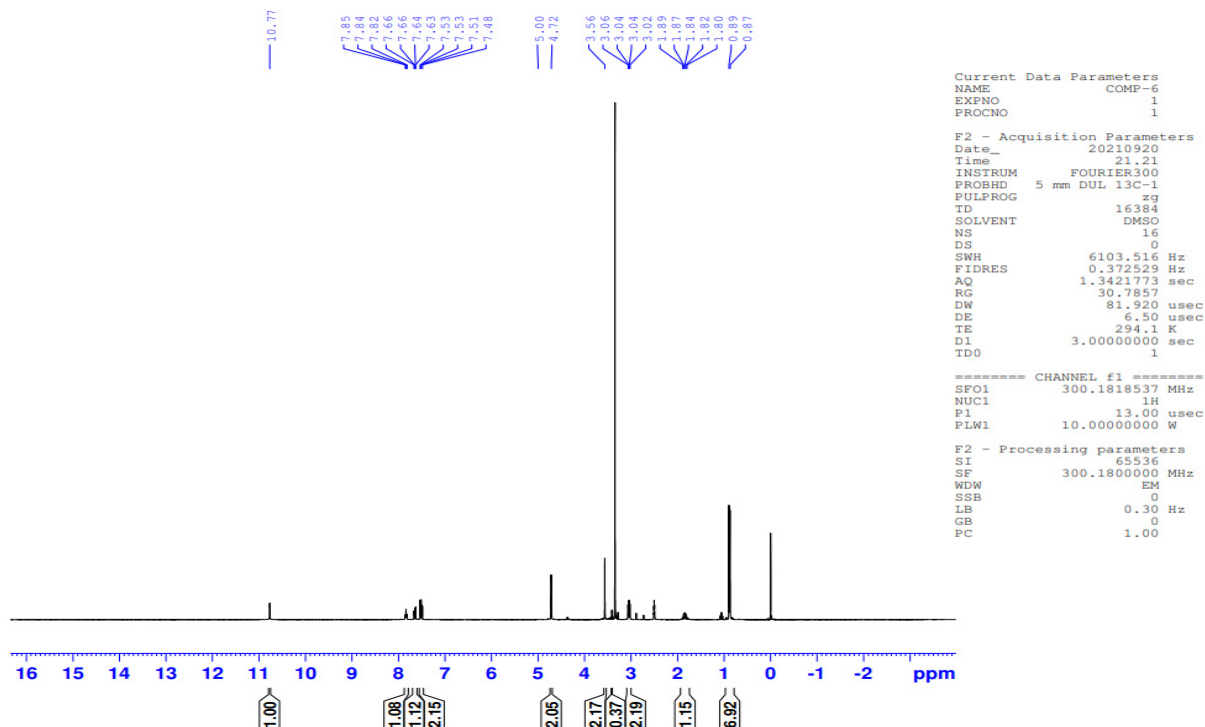Figure S16. <sup>1</sup>HNMR 3f: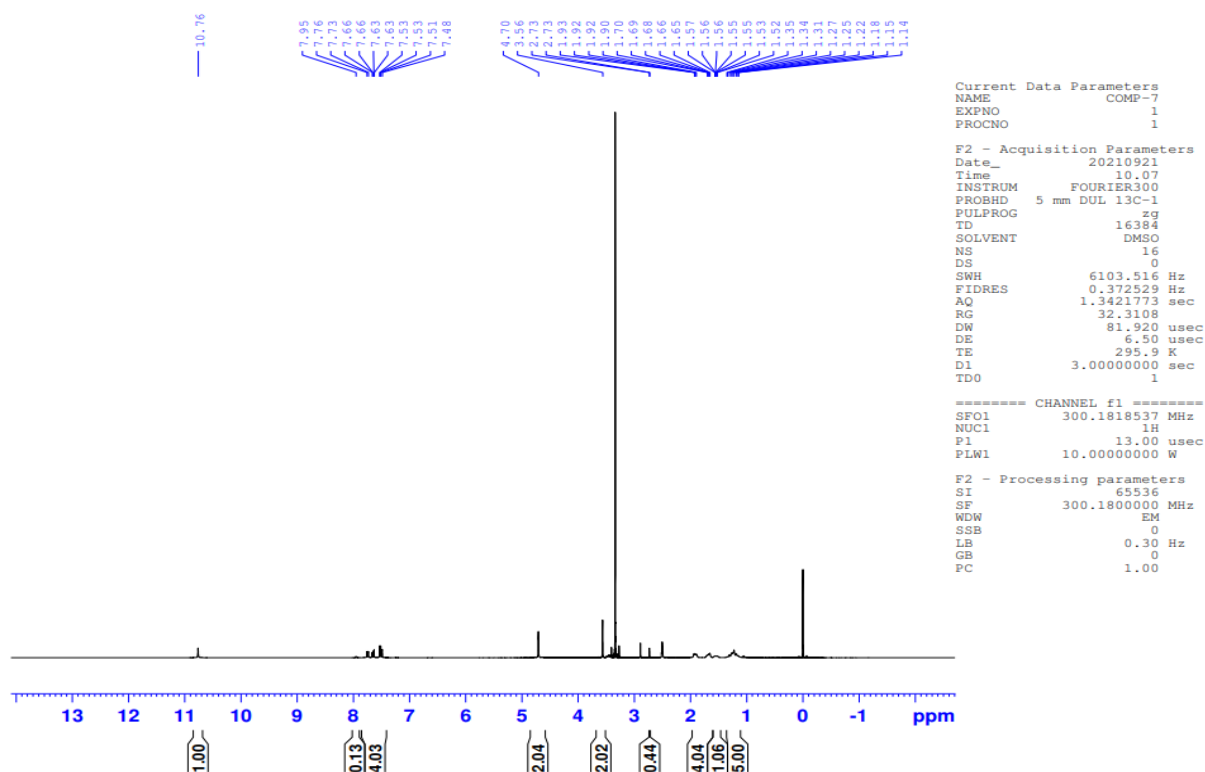

Figure S17. <sup>1</sup>HNMR 3g: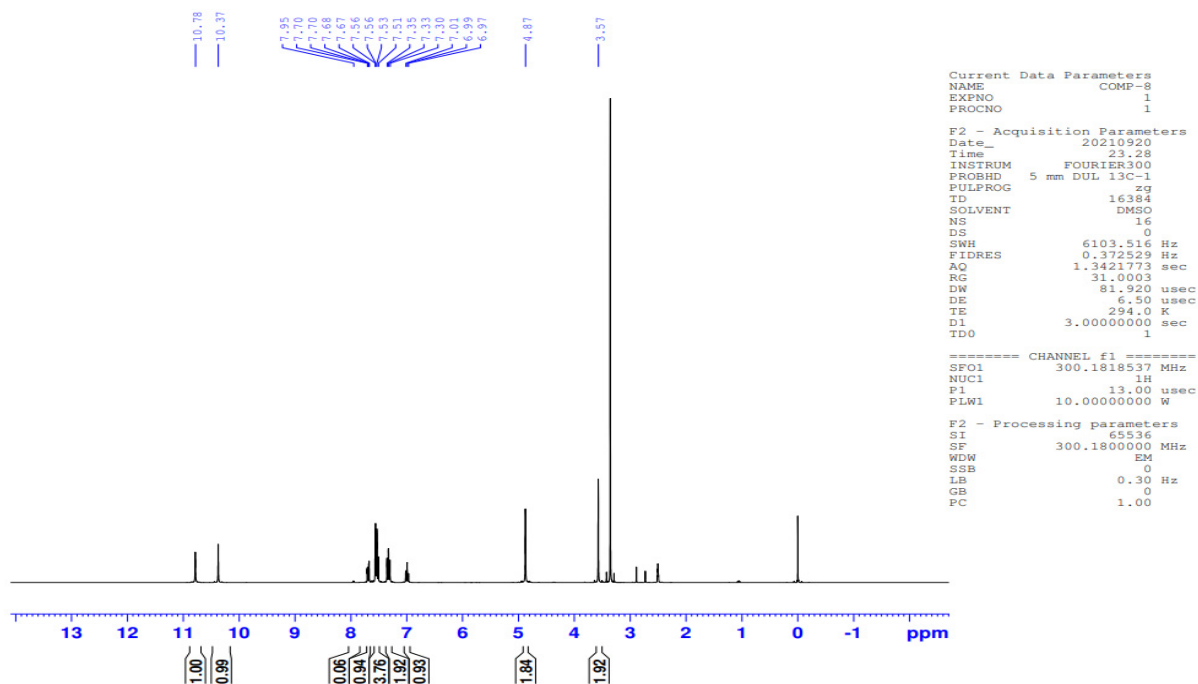Figure S18. <sup>1</sup>HNMR 3h: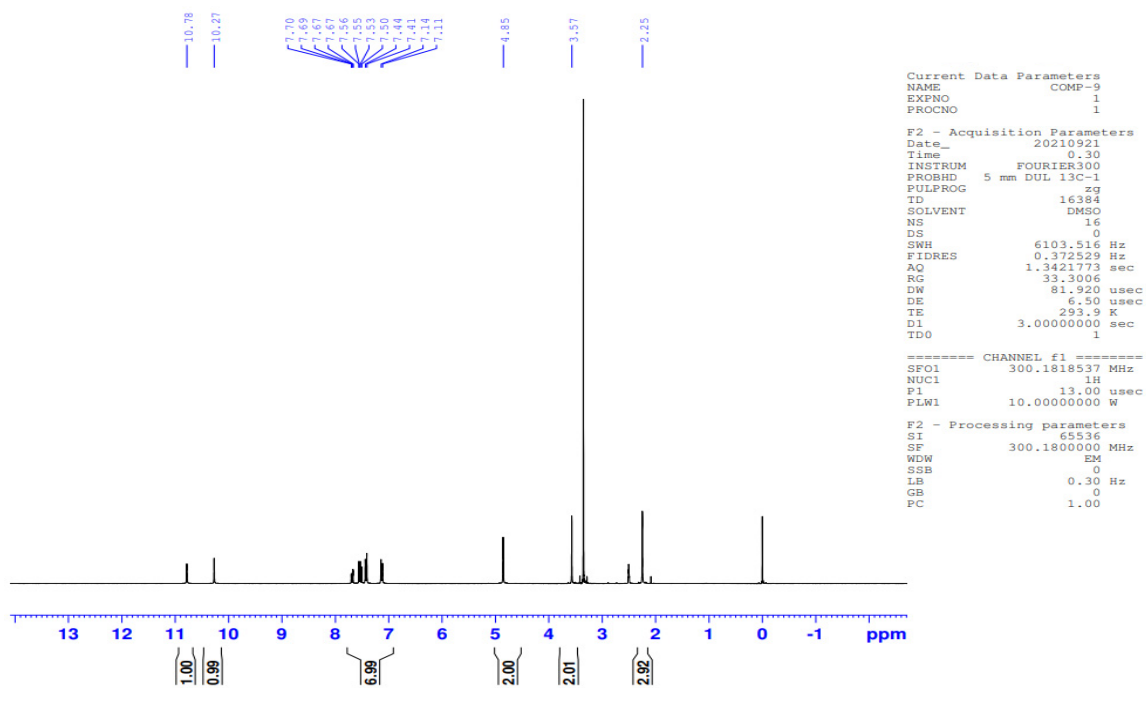

Figure S19. <sup>1</sup>HNMR 3i: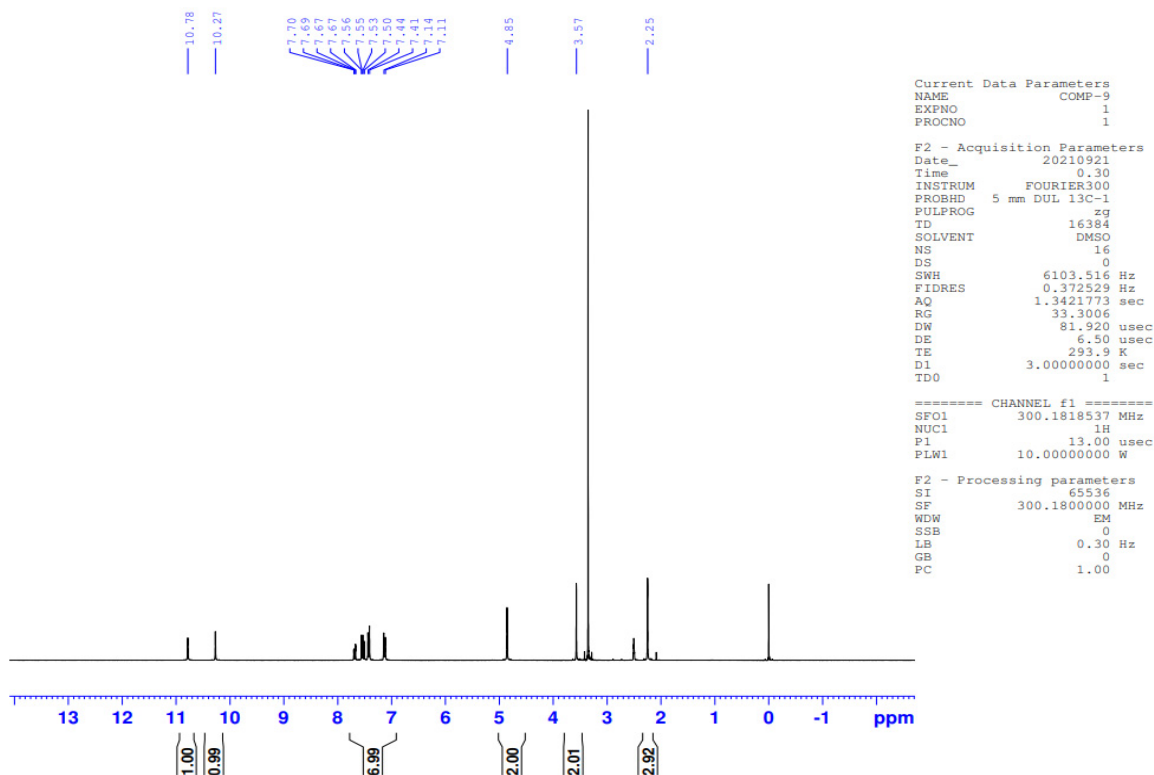Figure S20. <sup>1</sup>HNMR 3j: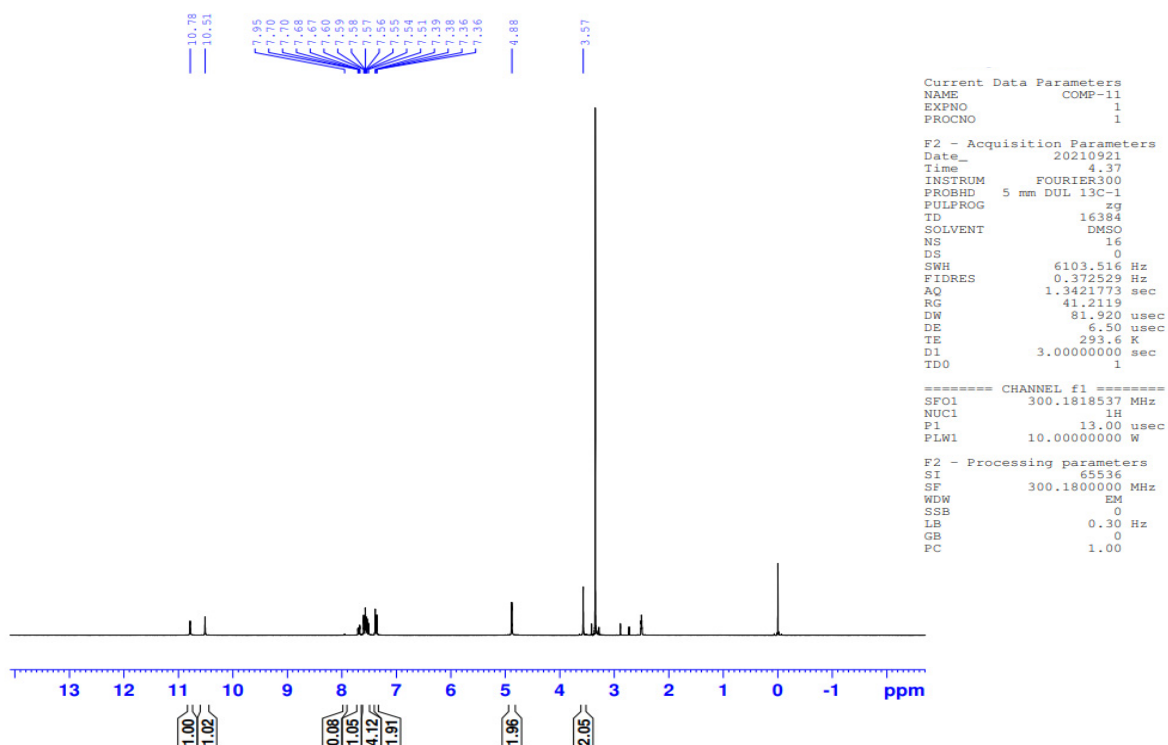

Figure S21.  $^{13}\text{C}$ NMR-3a: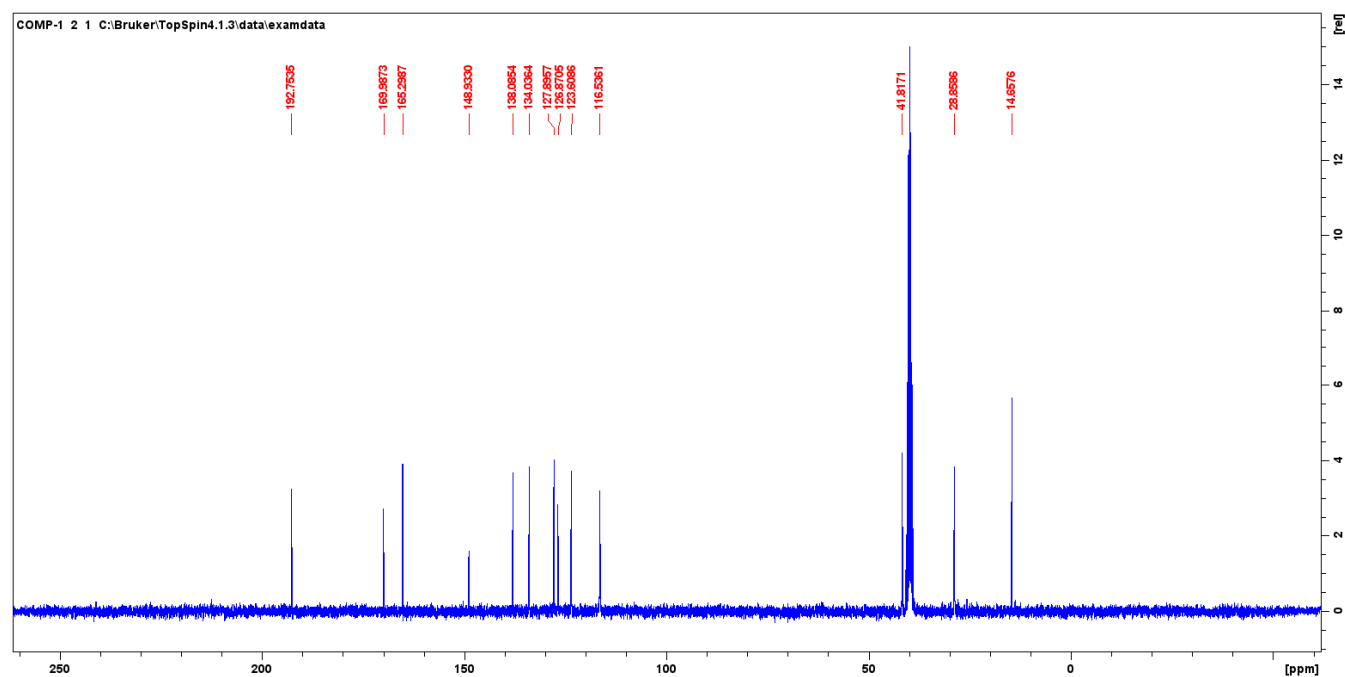Figure S22.  $^{13}\text{C}$ NMR-3b: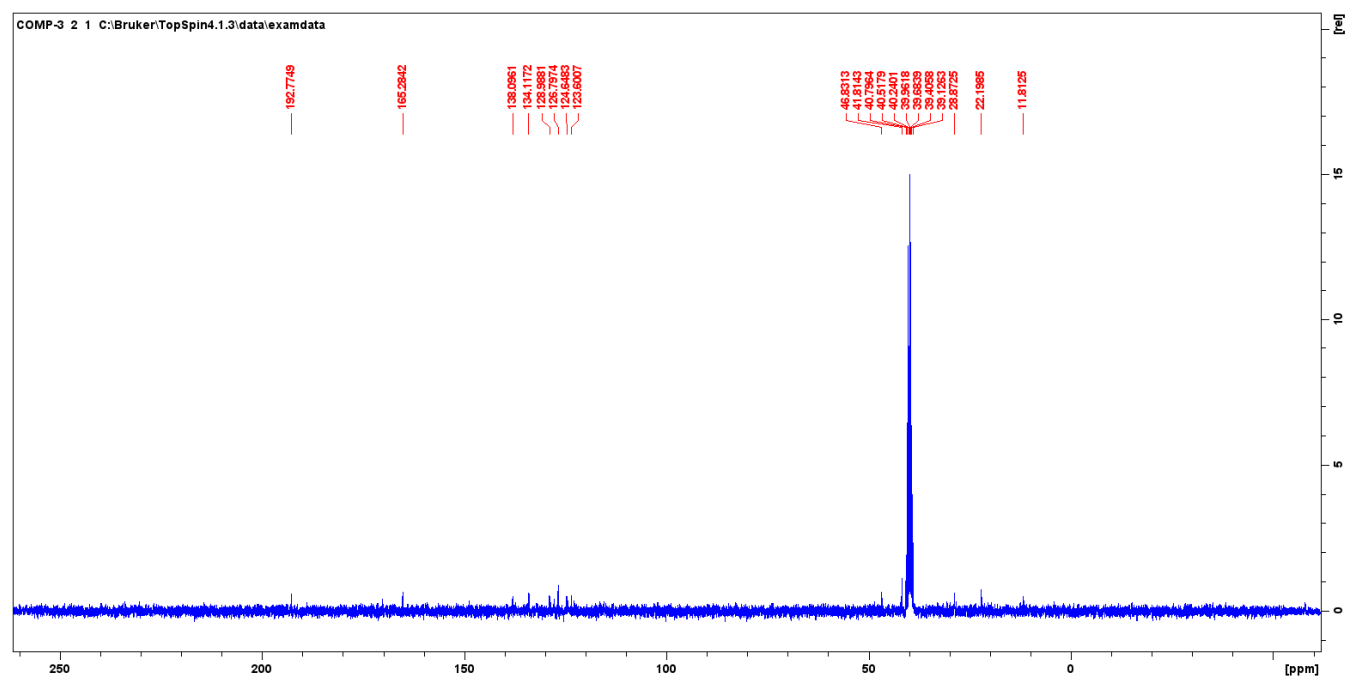

Figure S23.  $^{13}\text{C}$ NMR-3c: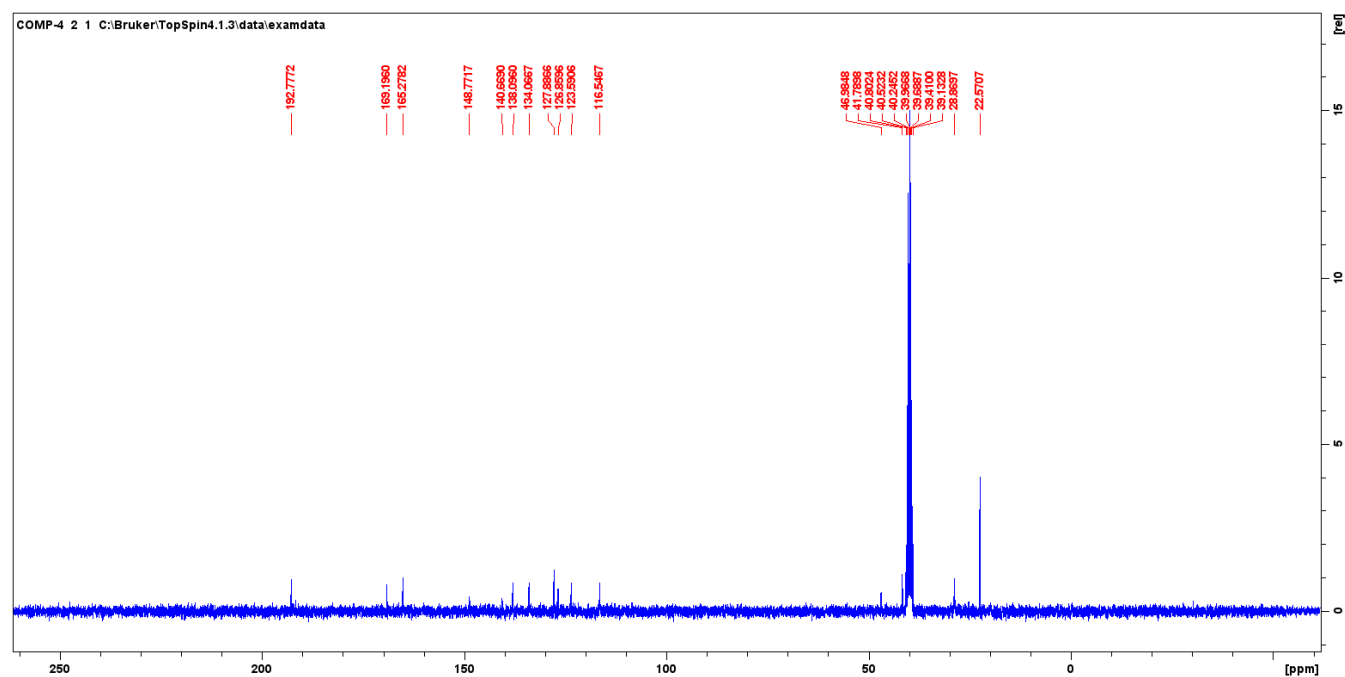Figure S24.  $^{13}\text{C}$ NMR-3e: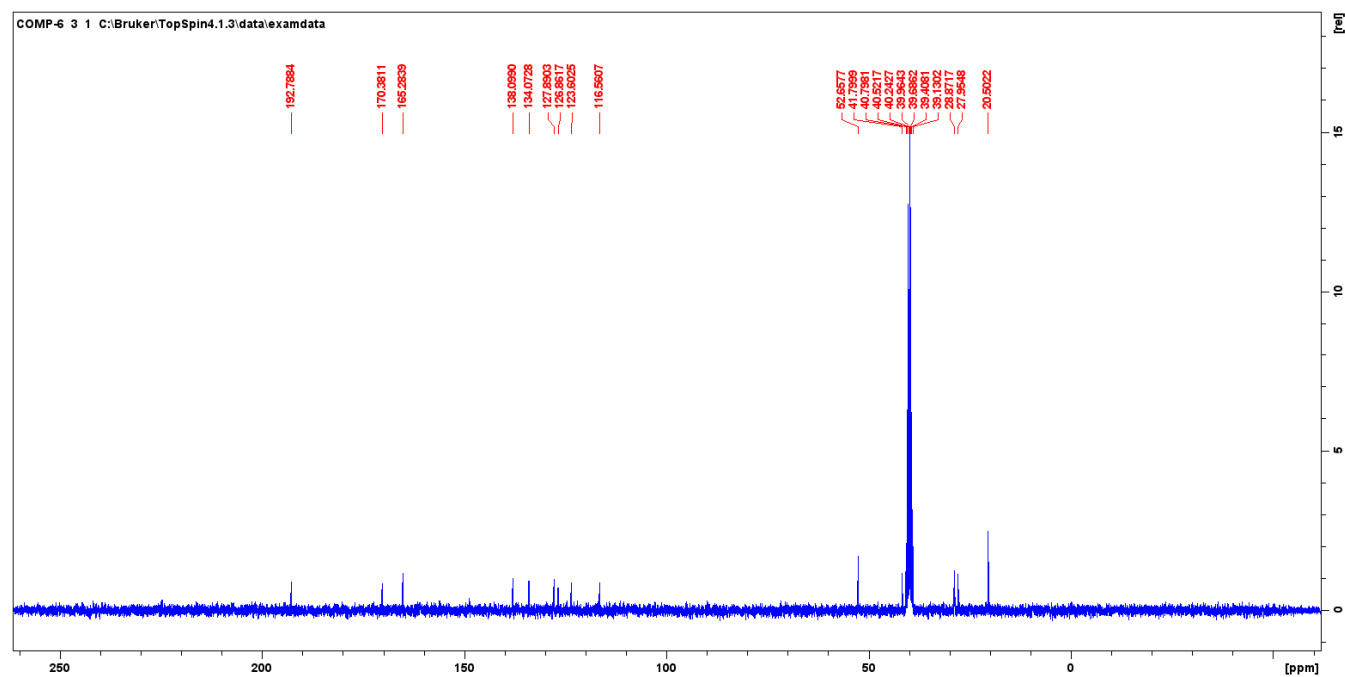

**Figure S25.  $^{13}\text{C}$ NMR-3f:**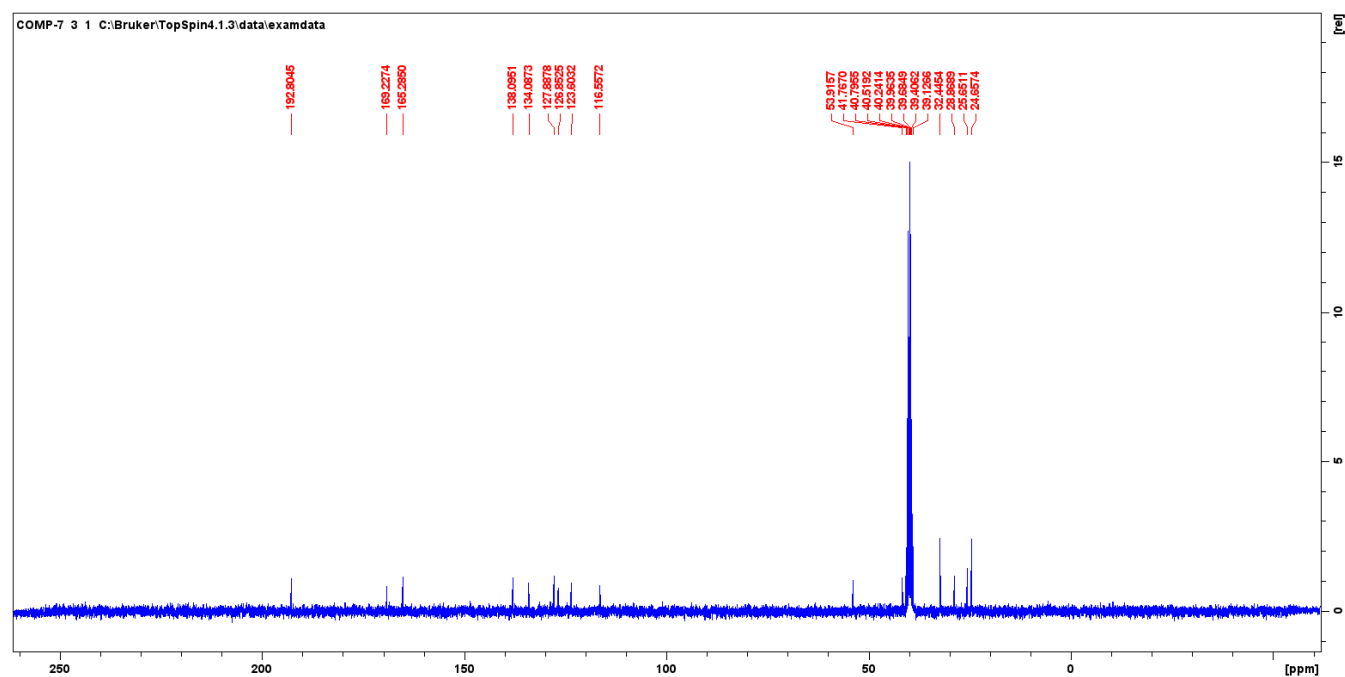**Figure S26.  $^{13}\text{C}$ NMR-3g:**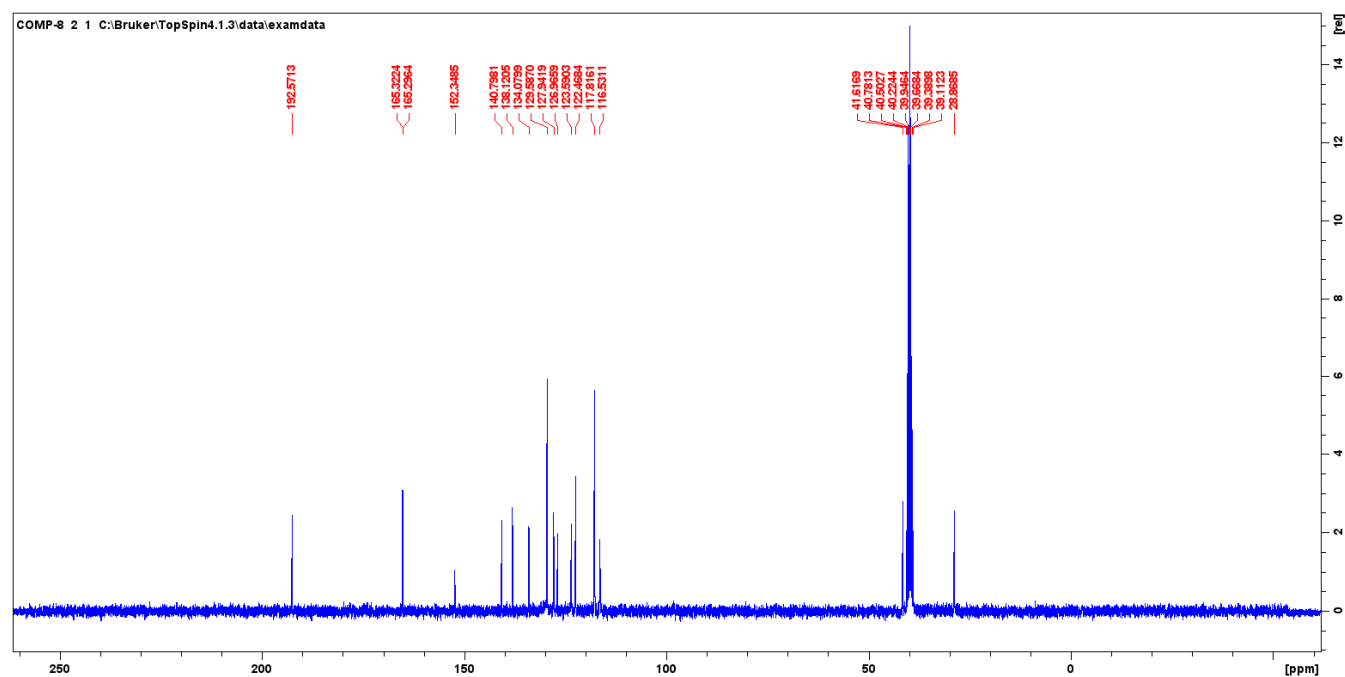

Figure S27.  $^{13}\text{C}$ NMR-3h: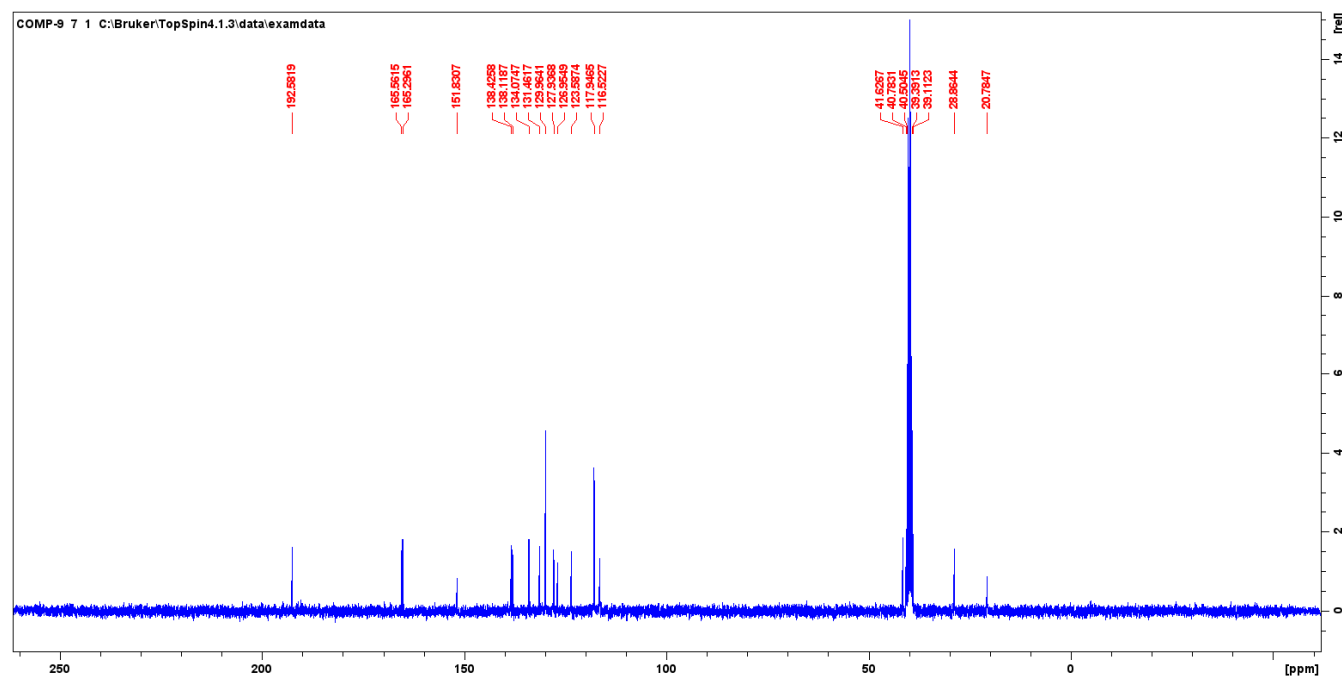Figure S28.  $^{13}\text{C}$ NMR-3i: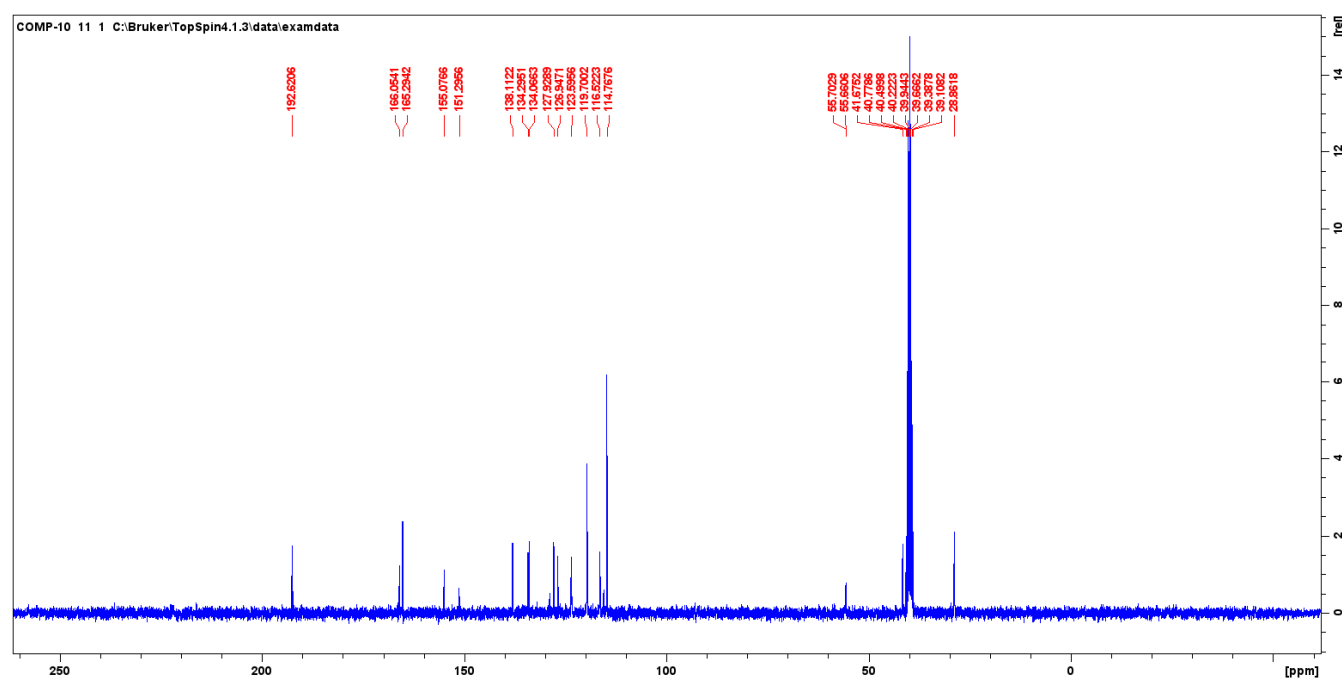

Figure S29.  $^{13}\text{C}$ NMR-3j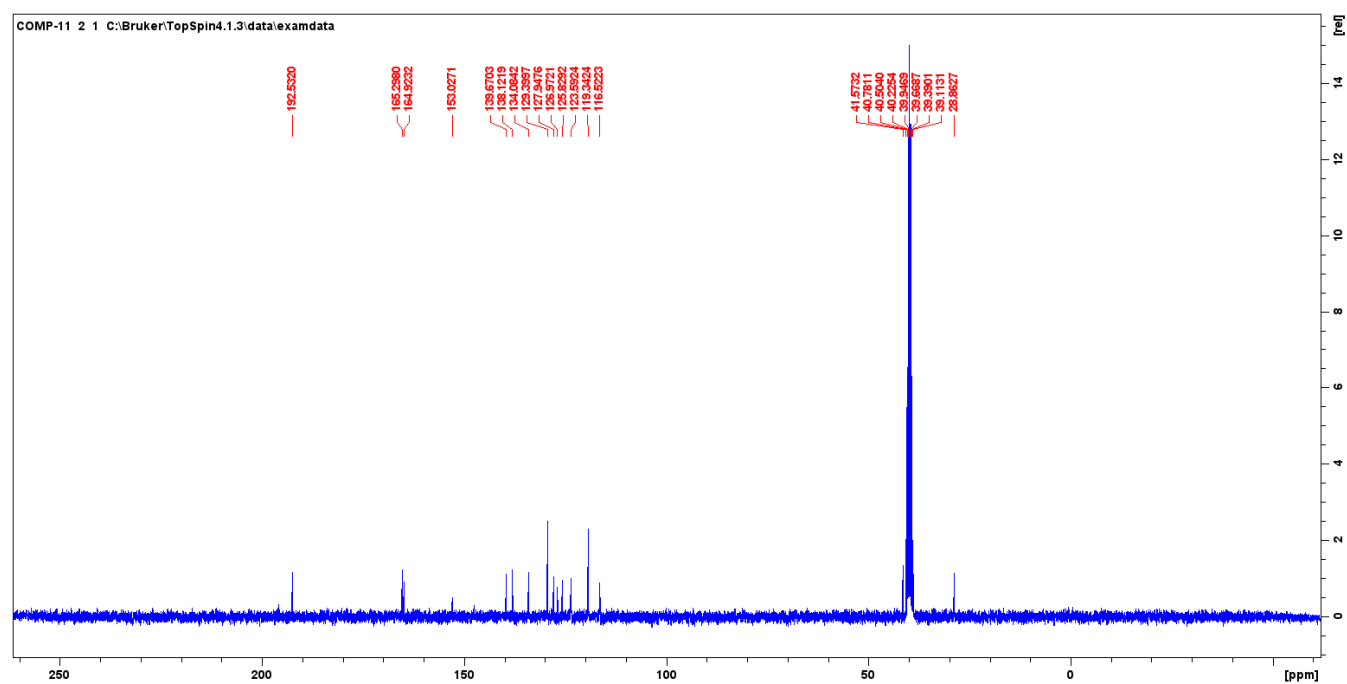

Figure S30. IR spectrum of 3a:

## DOPNALAB

| Item               | Value                                         |
|--------------------|-----------------------------------------------|
| Acquired Date&Time | 11.03.2022 15:25:51                           |
| Acquired by        | System Administrator                          |
| Filename           | C:\Users\dopnalab\Desktop\sazan\comp-1.1.ispd |
| Spectrum name      | comp-1.1                                      |
| Sample name        | comp-1                                        |
| Sample ID          |                                               |
| Option             |                                               |
| Comment            |                                               |
| No. of Scans       | 15                                            |
| Resolution         | 4 [cm <sup>-1</sup> ]                         |
| Apodization        | Happ-Genzel                                   |

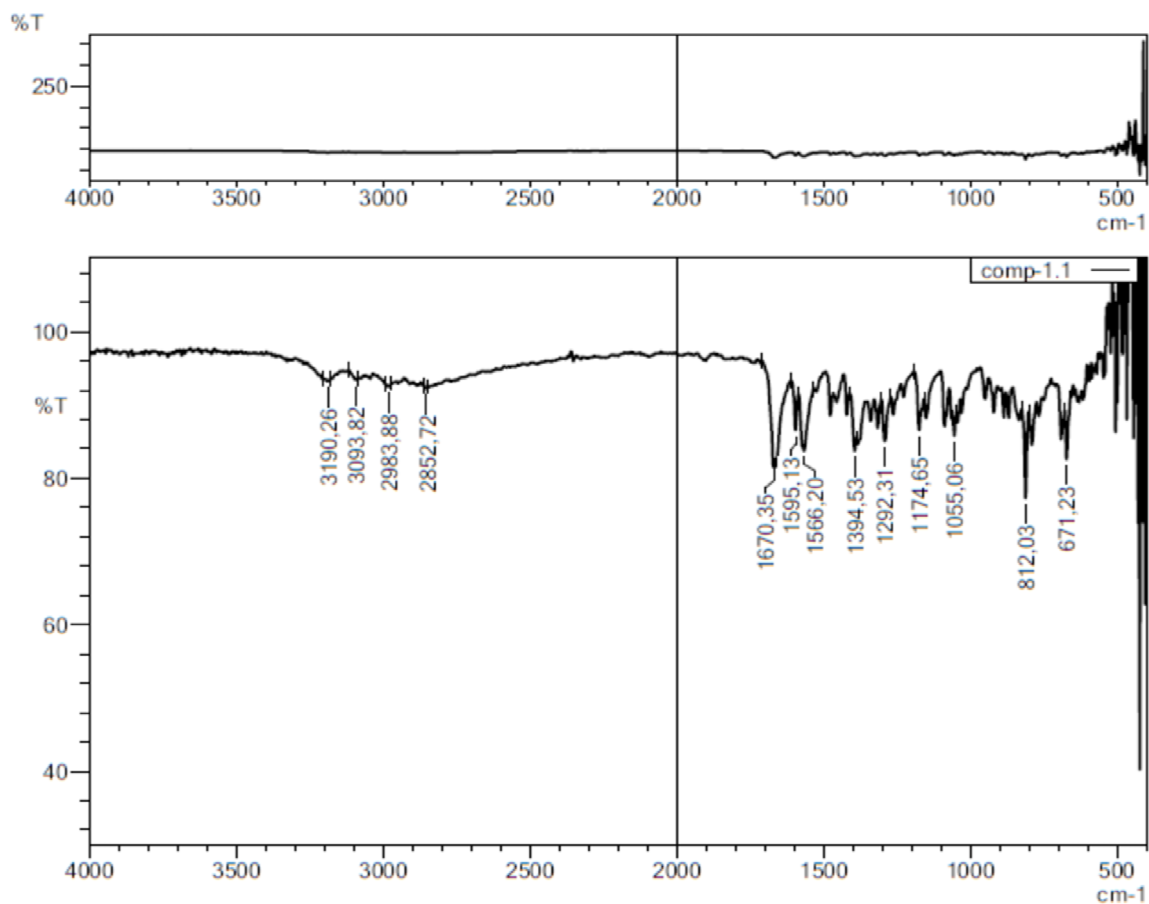

Figure S31. IR spectrum of 3b:

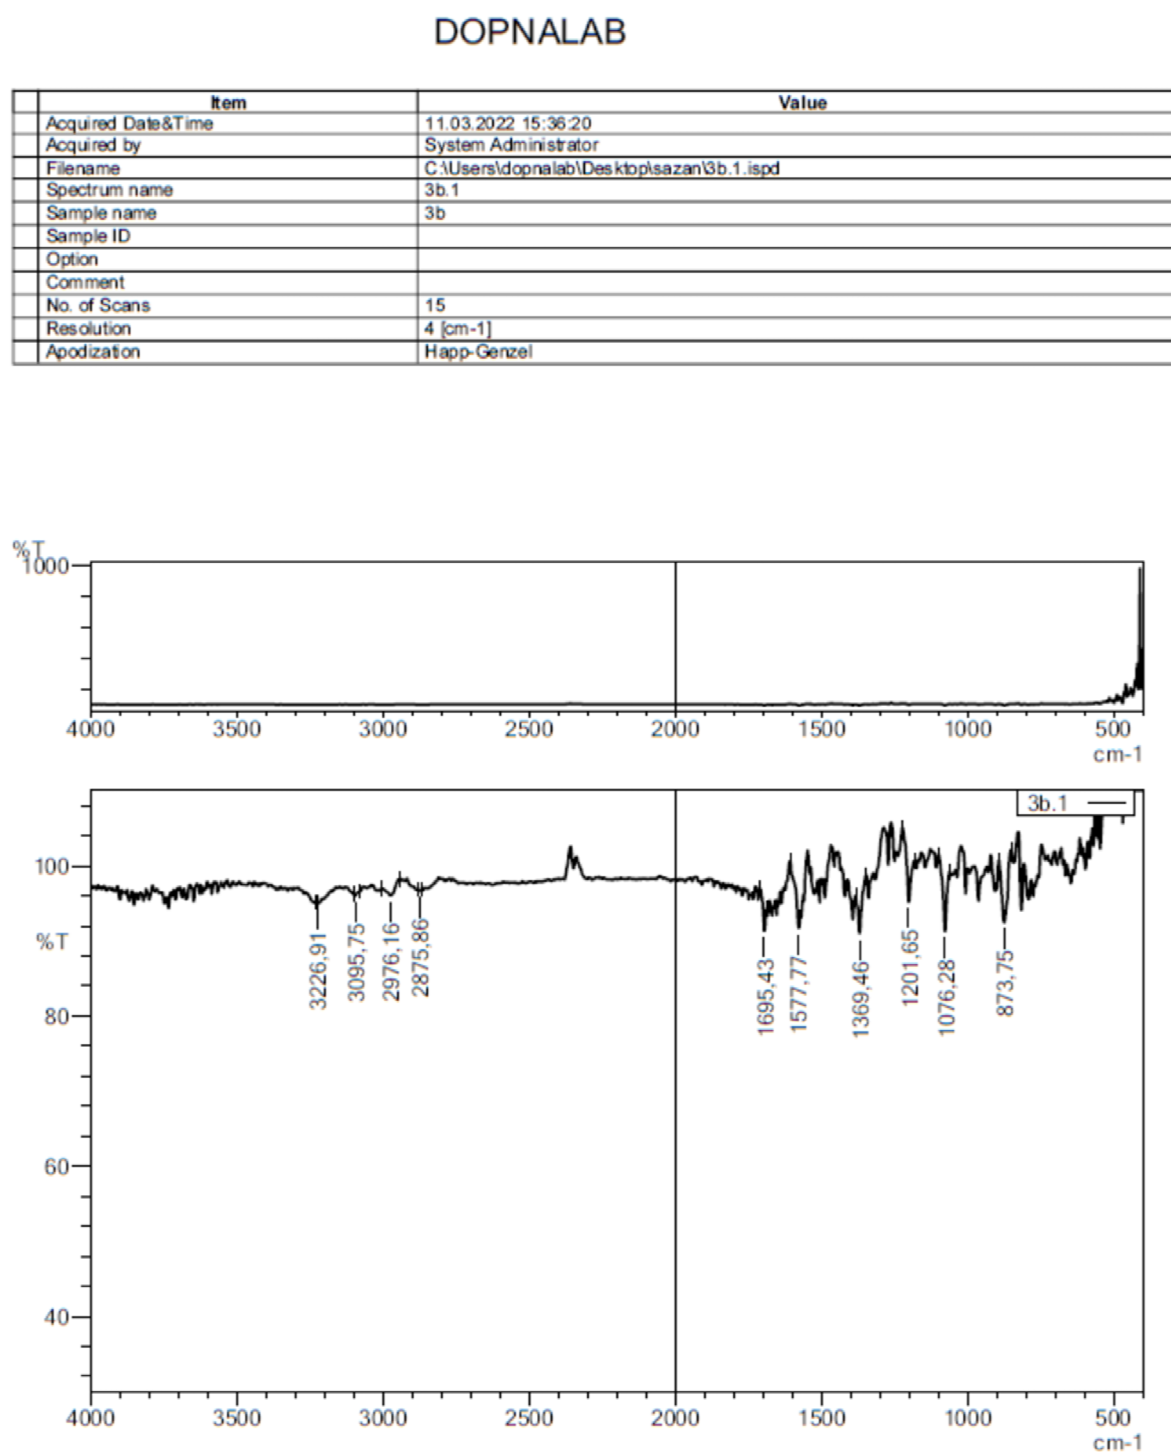

Figure S32. IR spectrum of 3c:

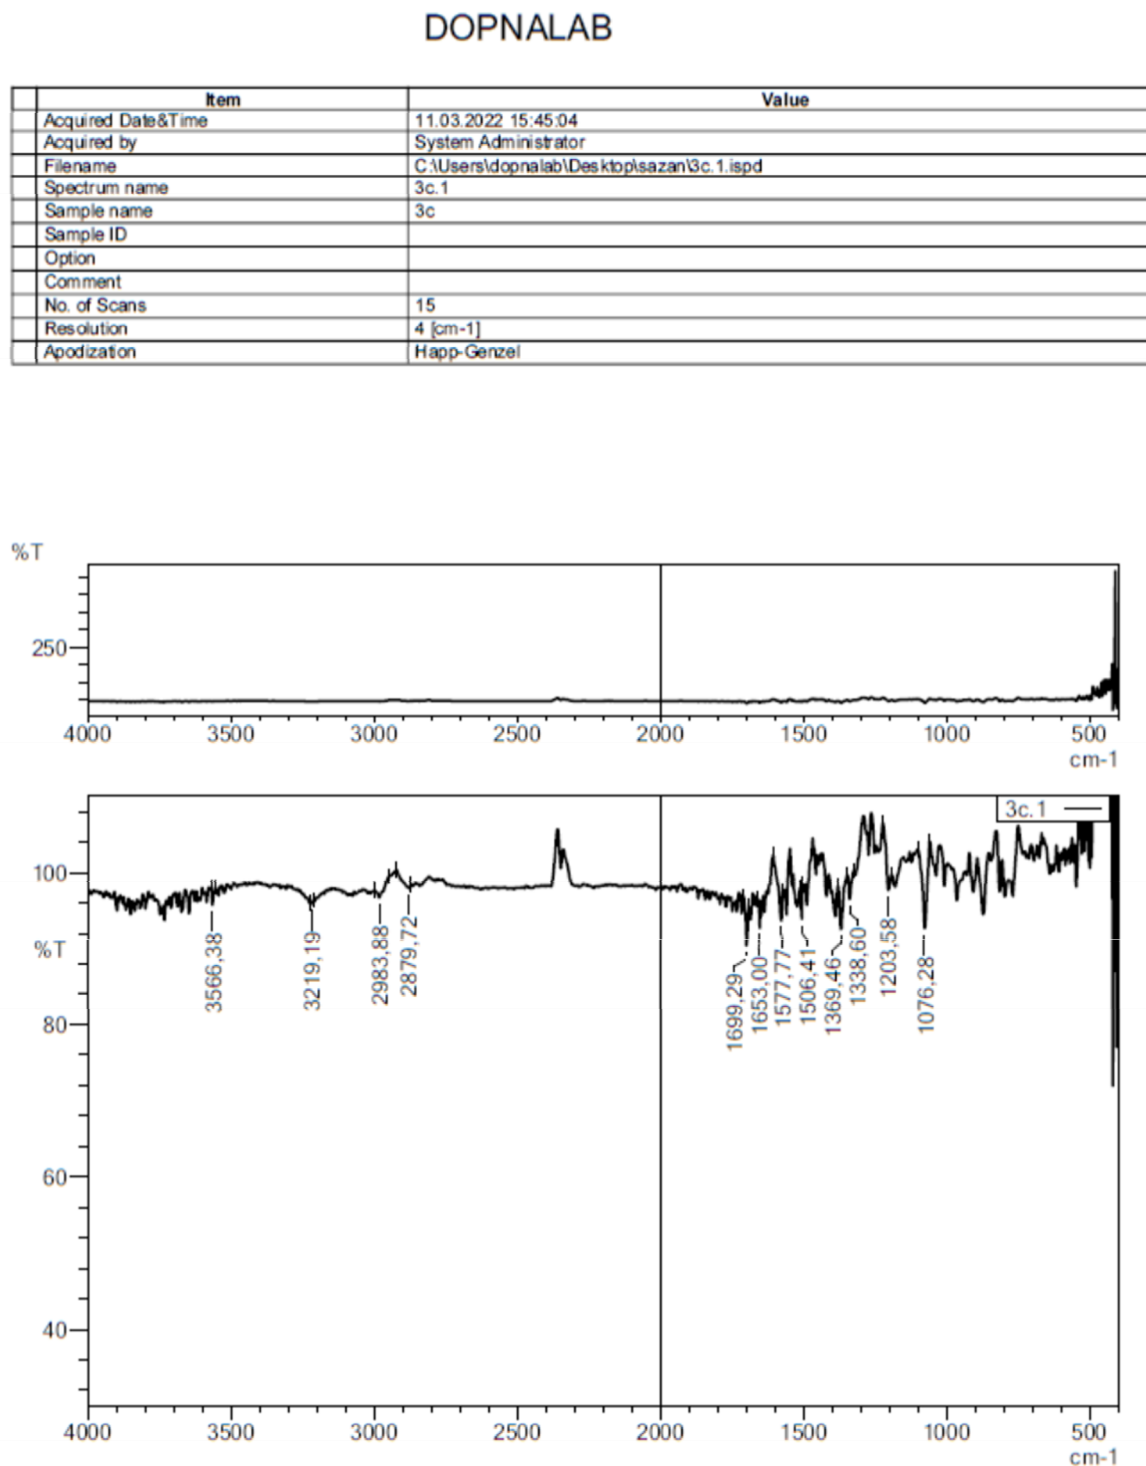

Figure S33. IR spectrum of 3d:

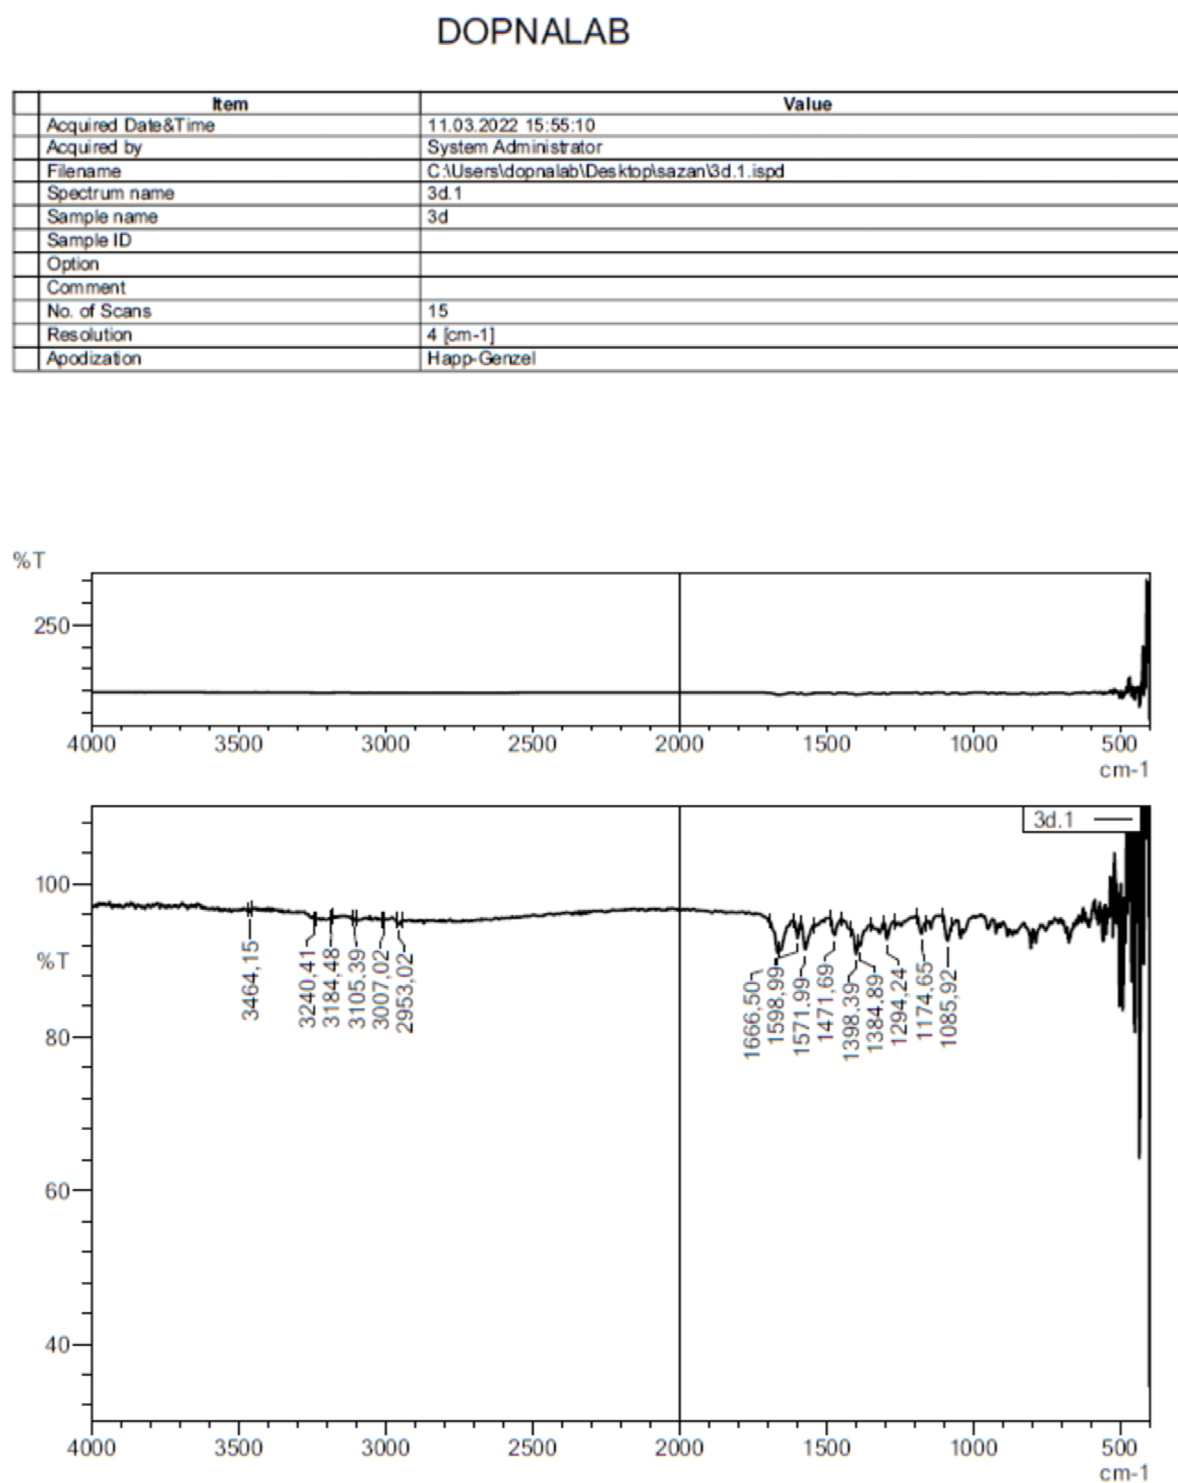

Figure S34. IR spectrum of 3e:

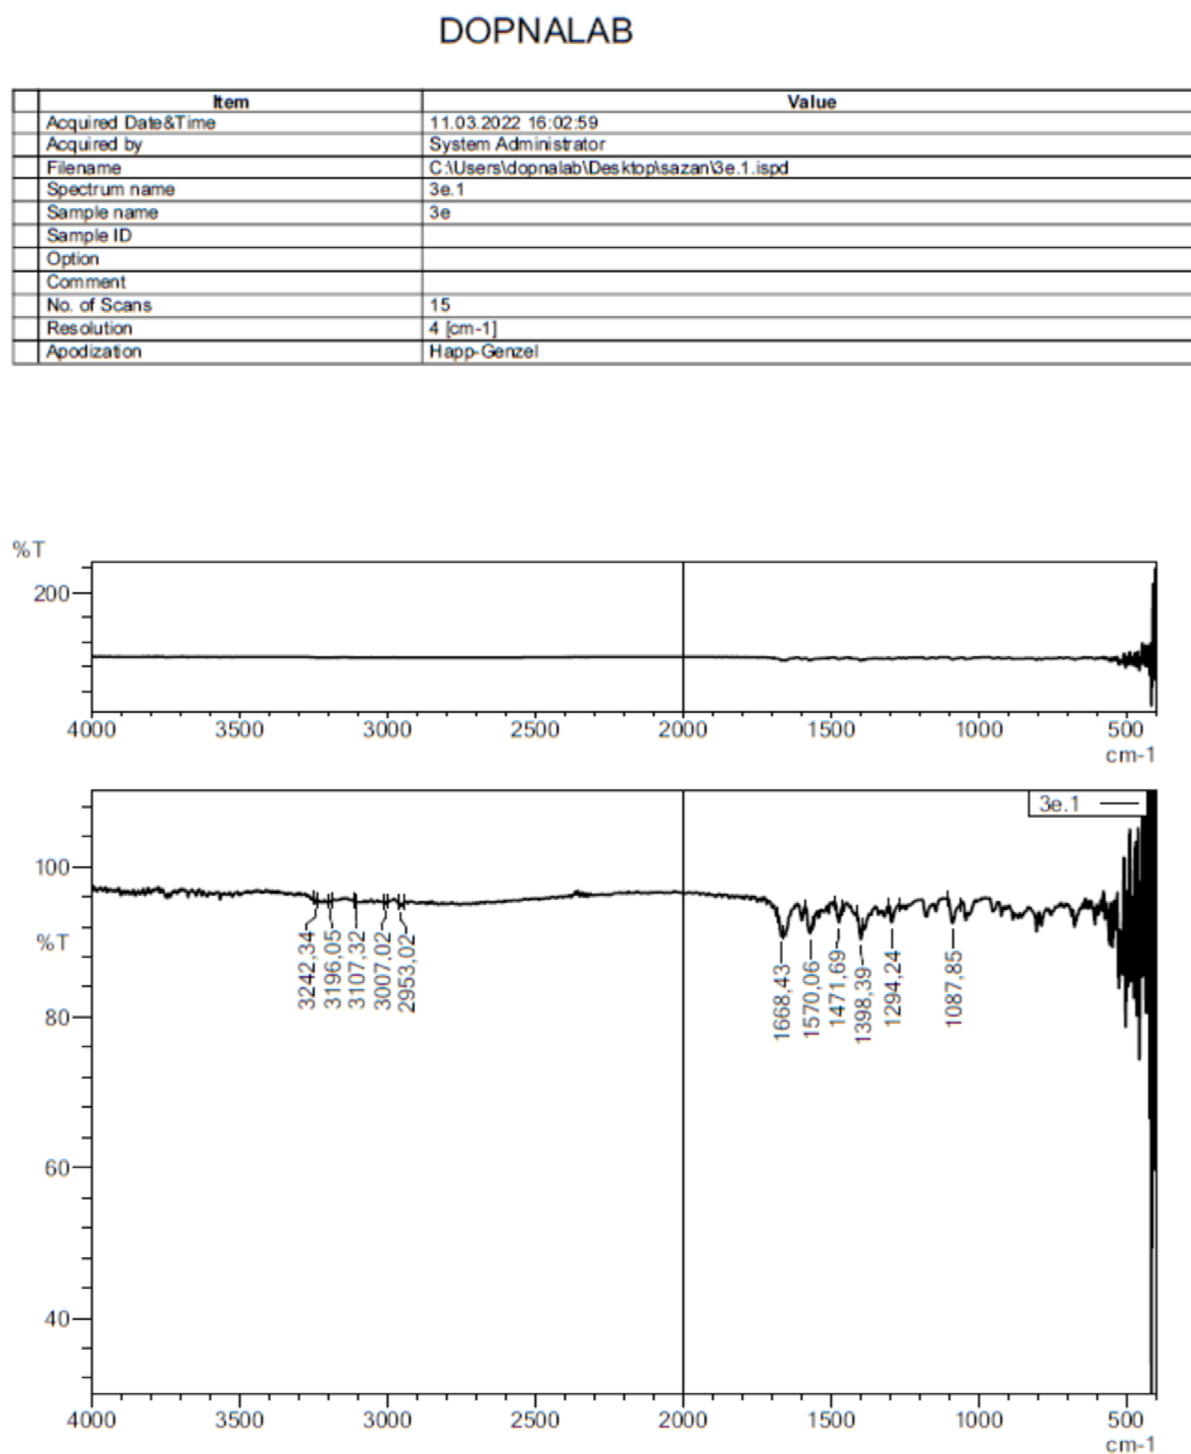

Figure S35. IR spectrum of 3f:

| DOPNALAB           |                                           |
|--------------------|-------------------------------------------|
| Item               | Value                                     |
| Acquired Date&Time | 11.03.2022 16:10:03                       |
| Acquired by        | System Administrator                      |
| Filename           | C:\Users\dopnalab\Desktop\sazan\3f.1.ispd |
| Spectrum name      | 3f.1                                      |
| Sample name        | 3f                                        |
| Sample ID          |                                           |
| Option             |                                           |
| Comment            |                                           |
| No. of Scans       | 15                                        |
| Resolution         | 4 [cm-1]                                  |
| Apodization        | Happ-Genzel                               |

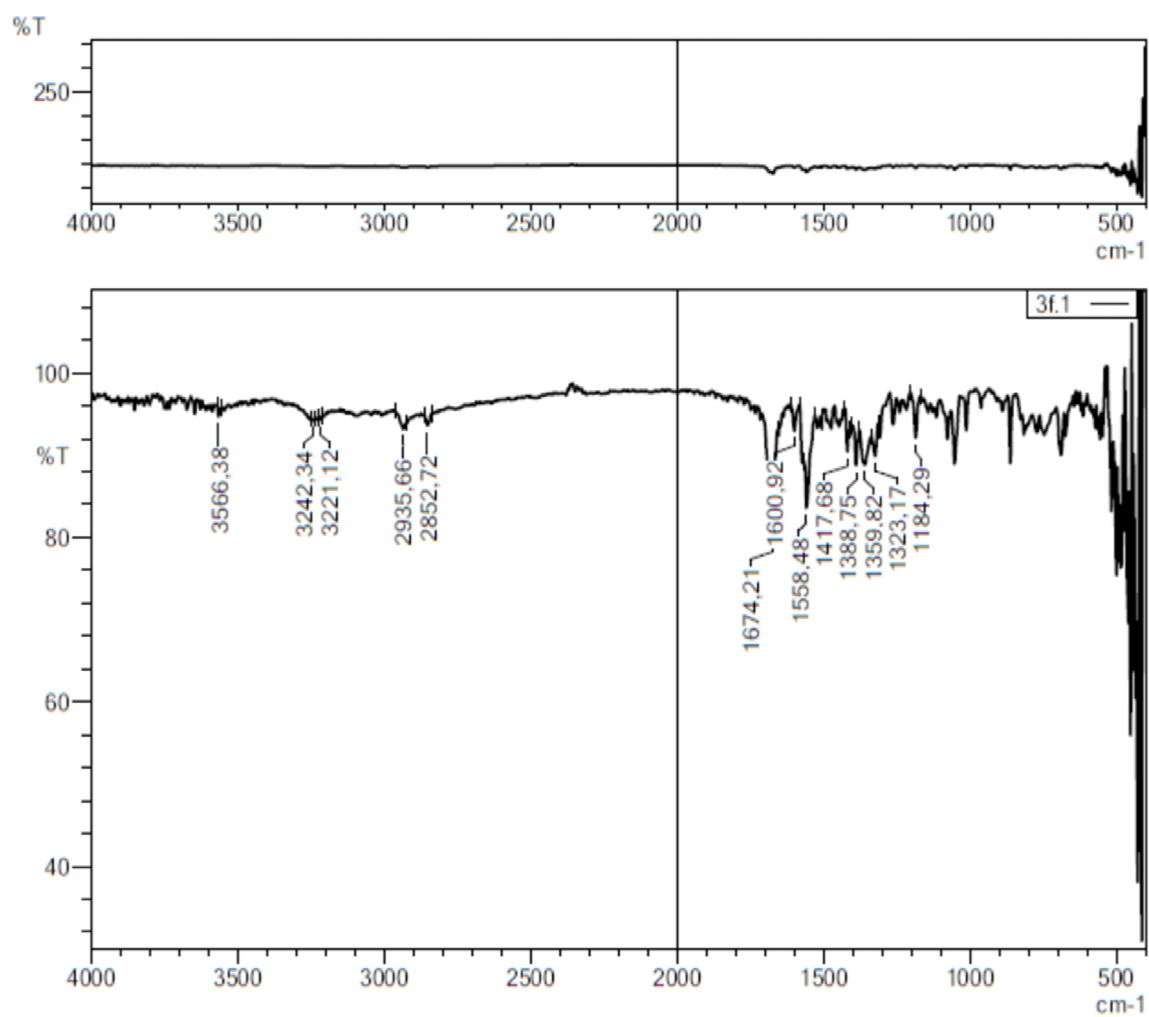

Figure S36. IR spectrum of 3g:

## DOPNALAB

| Item               | Value                                     |
|--------------------|-------------------------------------------|
| Acquired Date&Time | 11.03.2022 16:20:17                       |
| Acquired by        | System Administrator                      |
| Filename           | C:\Users\dopnalab\Desktop\sazan\3g.1.ispd |
| Spectrum name      | 3g.1                                      |
| Sample name        | 3g                                        |
| Sample ID          |                                           |
| Option             |                                           |
| Comment            |                                           |
| No. of Scans       | 15                                        |
| Resolution         | 4 [cm <sup>-1</sup> ]                     |
| Apodization        | Happ-Genzel                               |

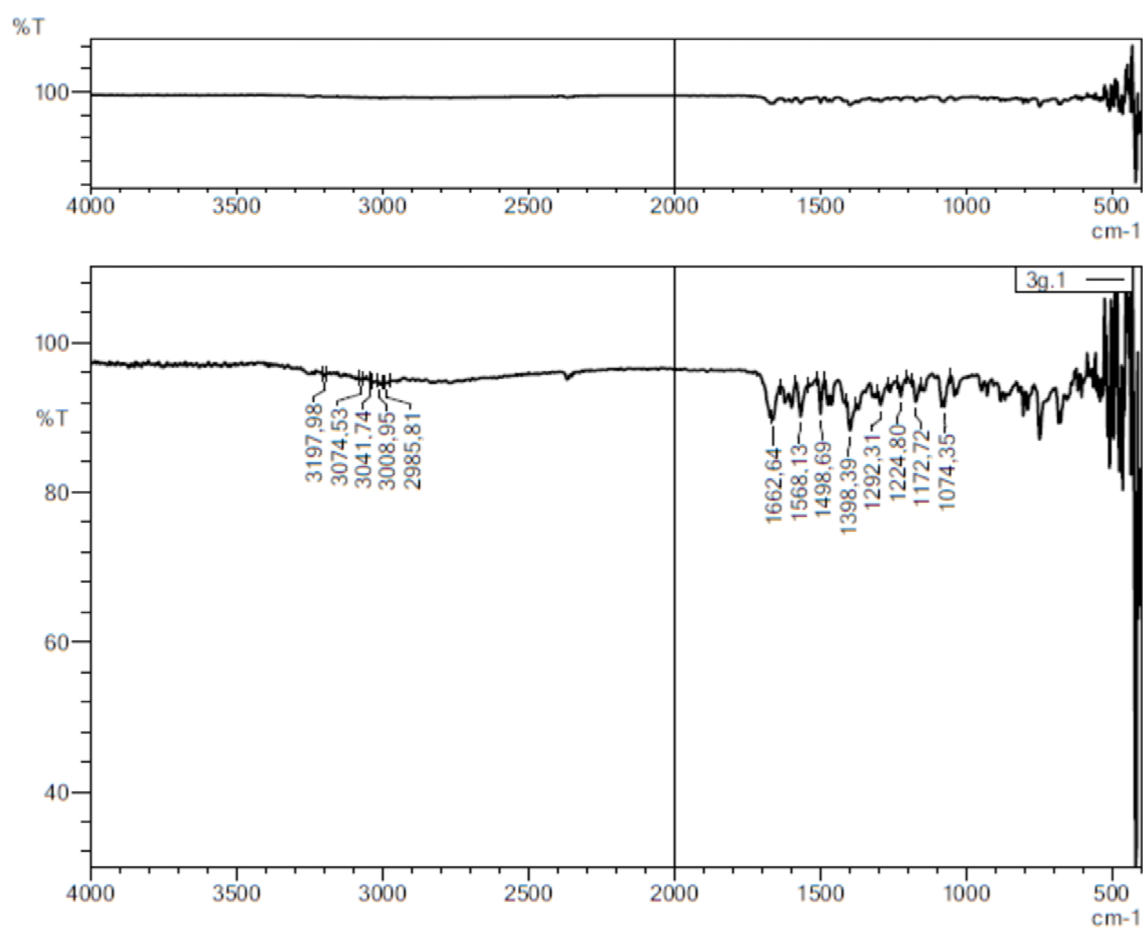

Figure S37. IR spectrum of 3h:

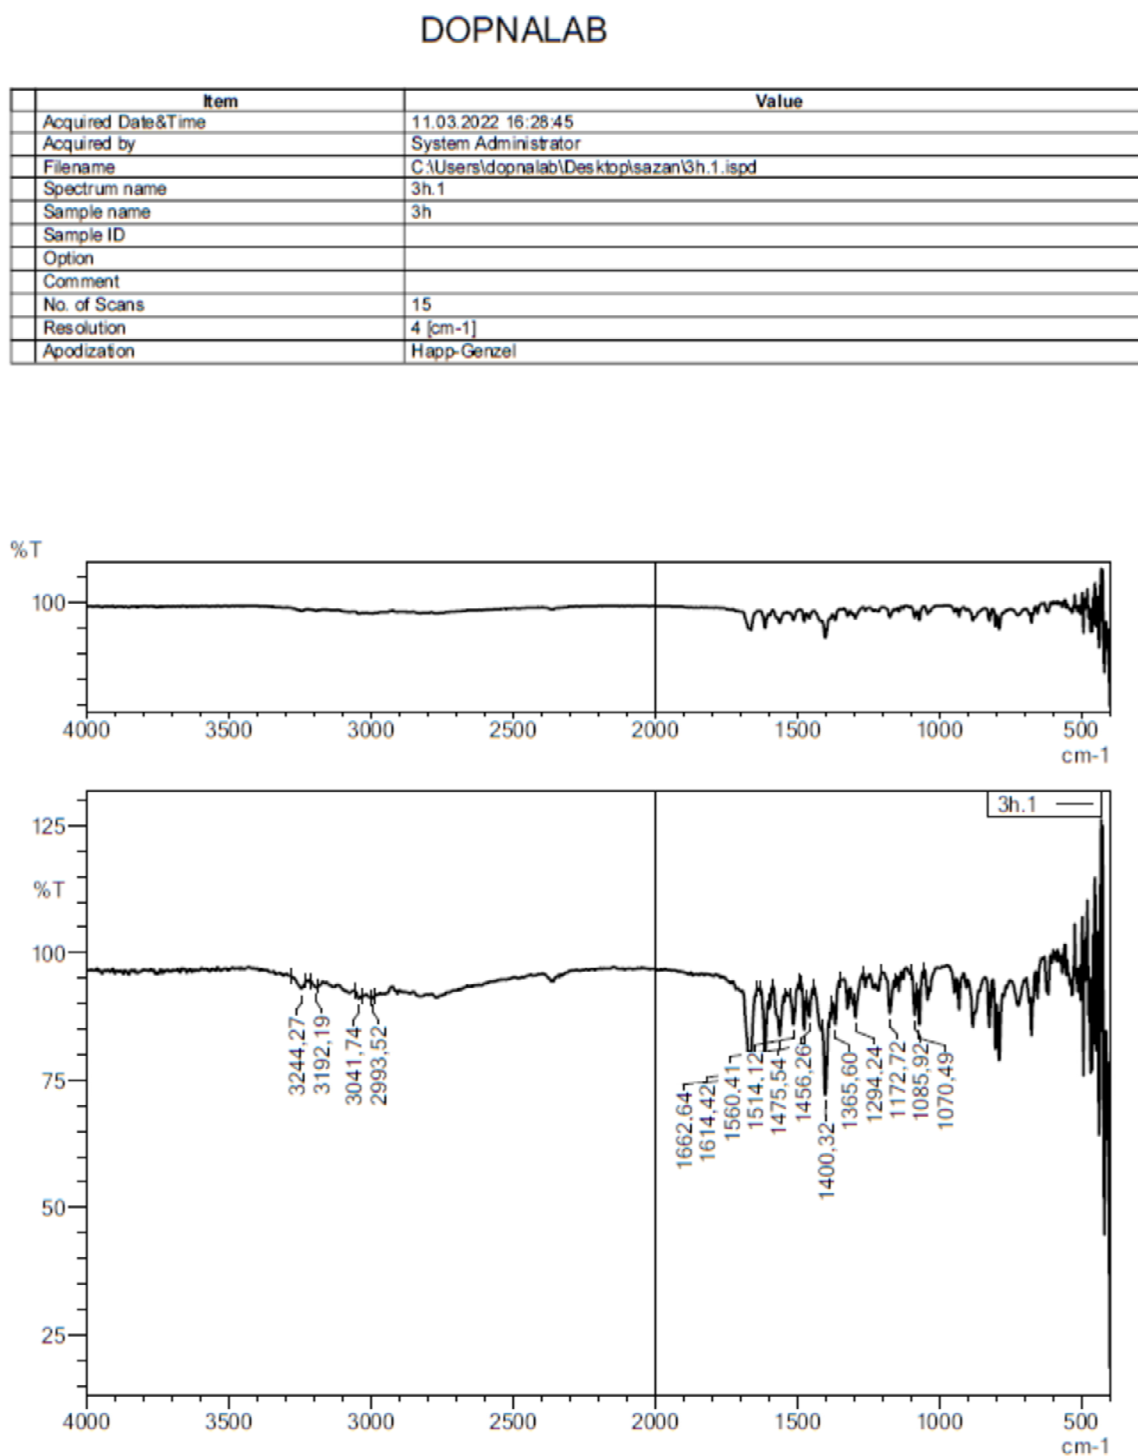

Figure S38. IR spectrum of 3i:

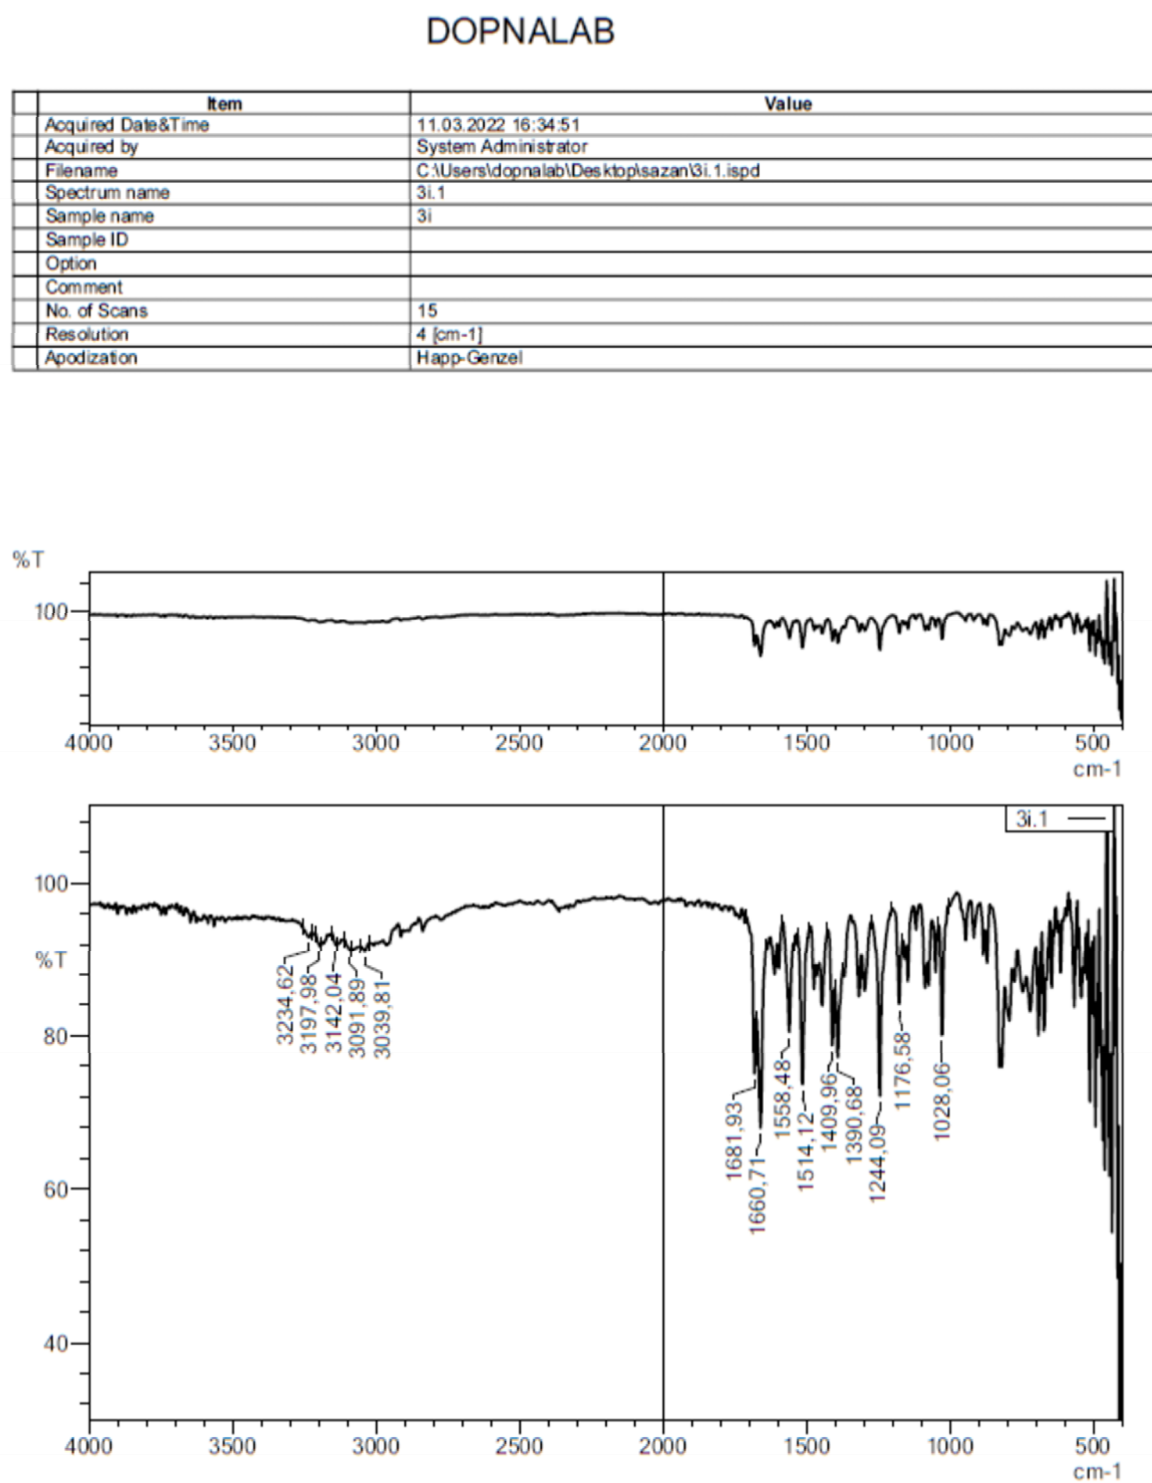

Figure S39. IR spectrum of 3j:

## DOPNALAB

| Item               | Value                                     |
|--------------------|-------------------------------------------|
| Acquired Date&Time | 11.03.2022 16:39:14                       |
| Acquired by        | System Administrator                      |
| Filename           | C:\Users\dopnalab\Desktop\sazan\3j.1.ispd |
| Spectrum name      | 3j.1                                      |
| Sample name        | 3j                                        |
| Sample ID          |                                           |
| Option             |                                           |
| Comment            |                                           |
| No. of Scans       | 15                                        |
| Resolution         | 4 [cm <sup>-1</sup> ]                     |
| Apodization        | Happ-Genzel                               |

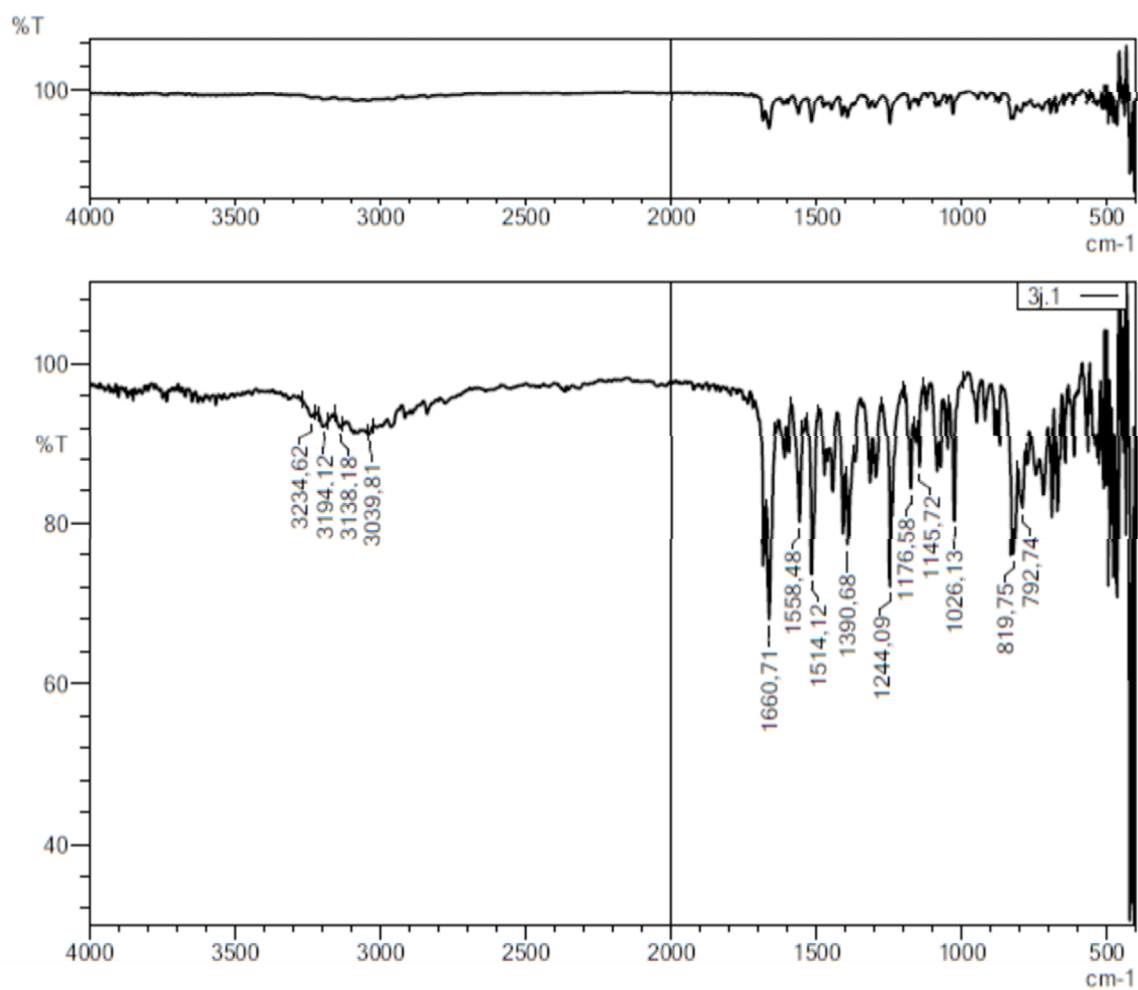

Figure S40. <sup>1</sup>HNMR of 2a: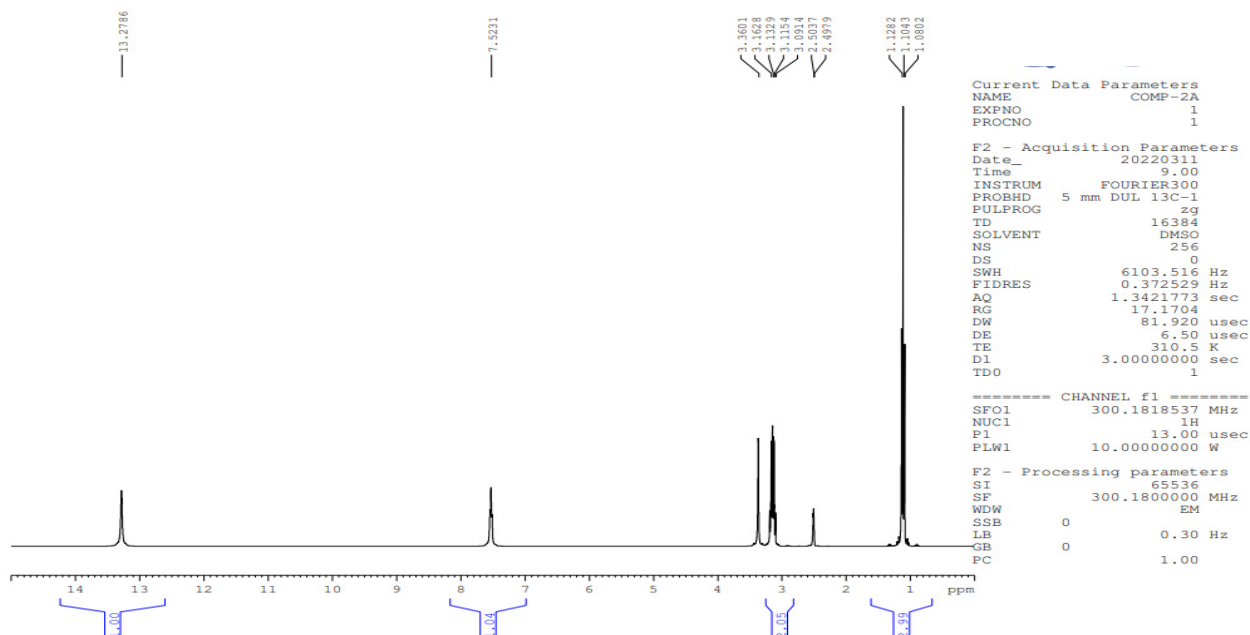Figure S41. <sup>1</sup>HNMR of 2b: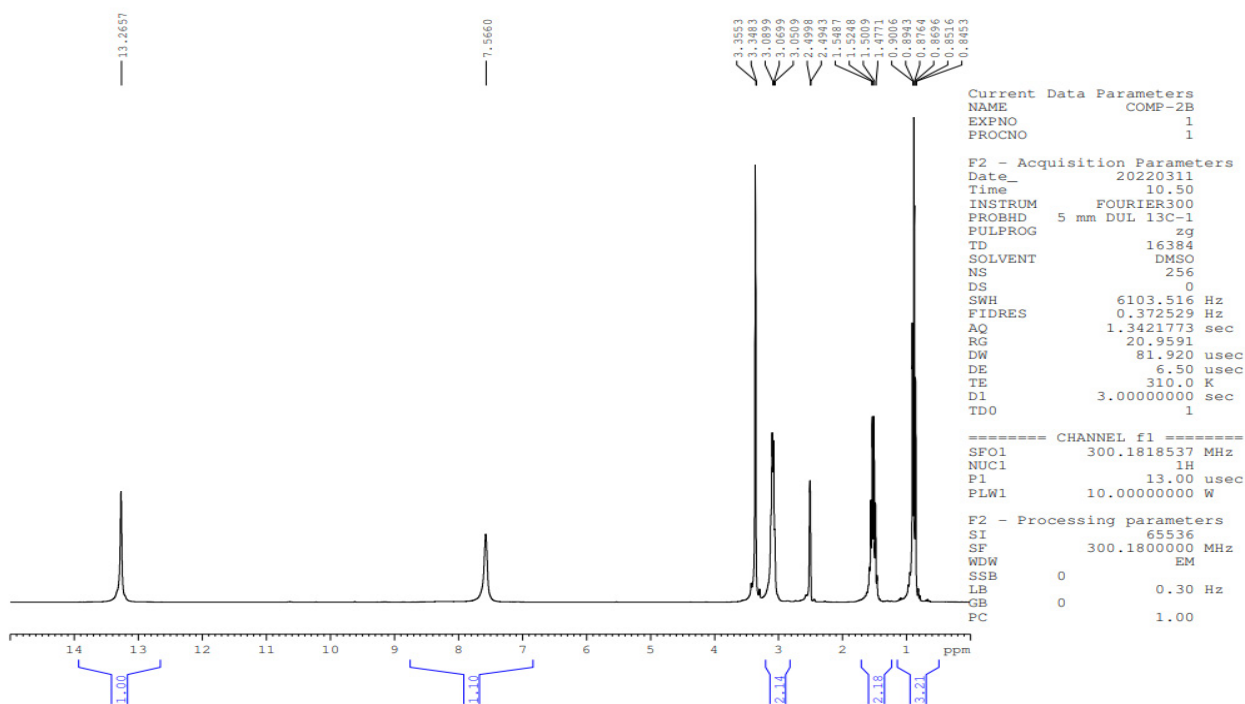

Figure S42. <sup>1</sup>HNMR of 2c: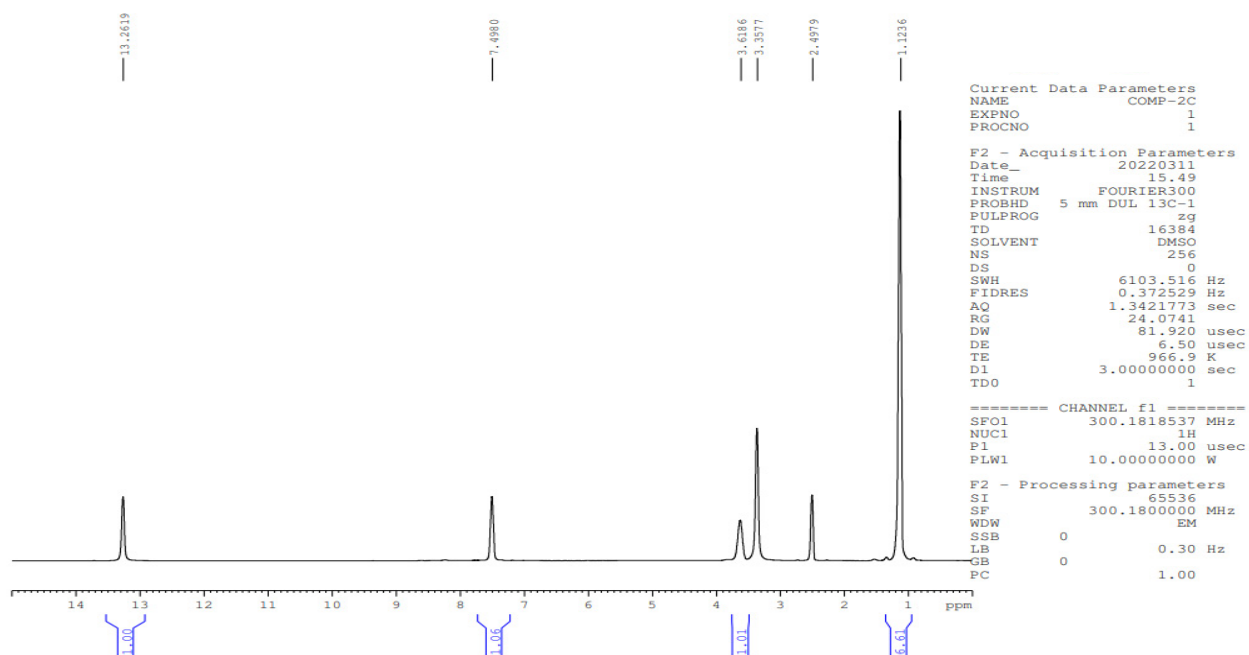Figure S43. <sup>1</sup>HNMR of 2d: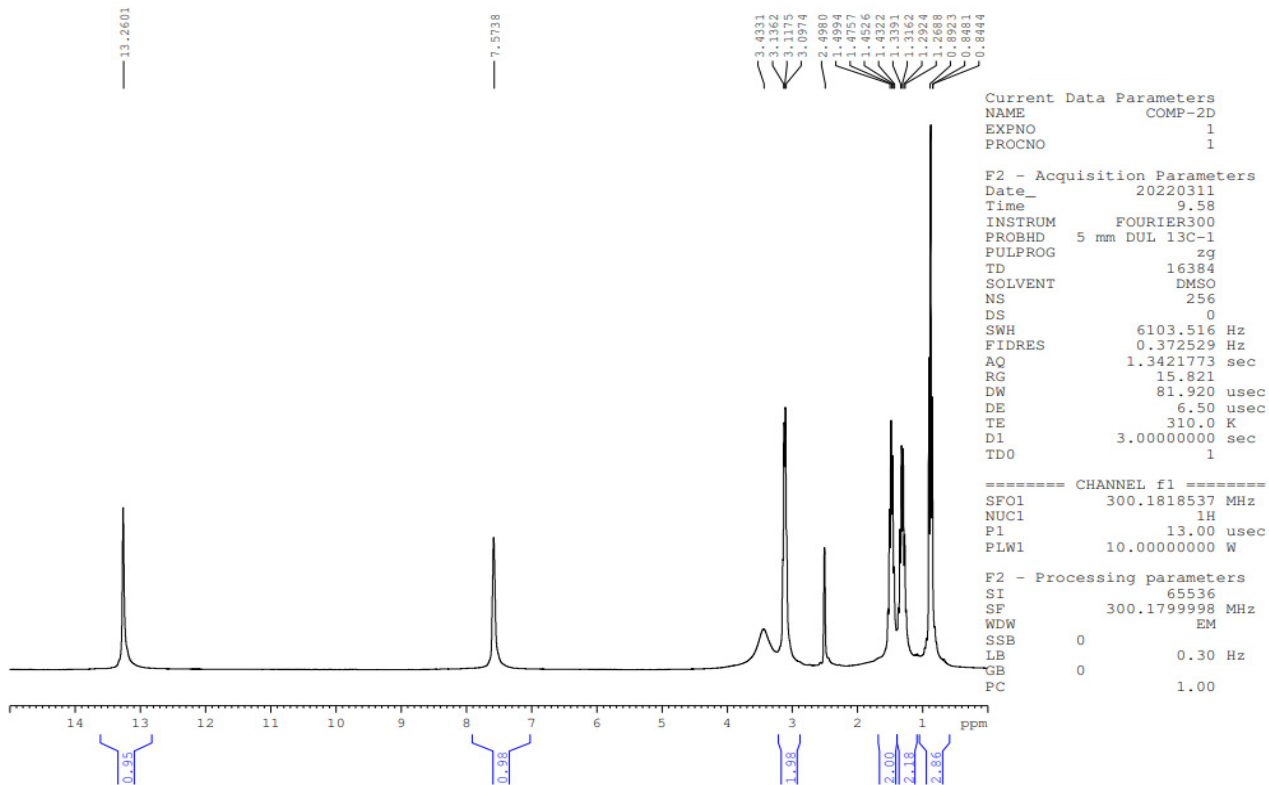

Figure S44. <sup>1</sup>HNMR of 2e: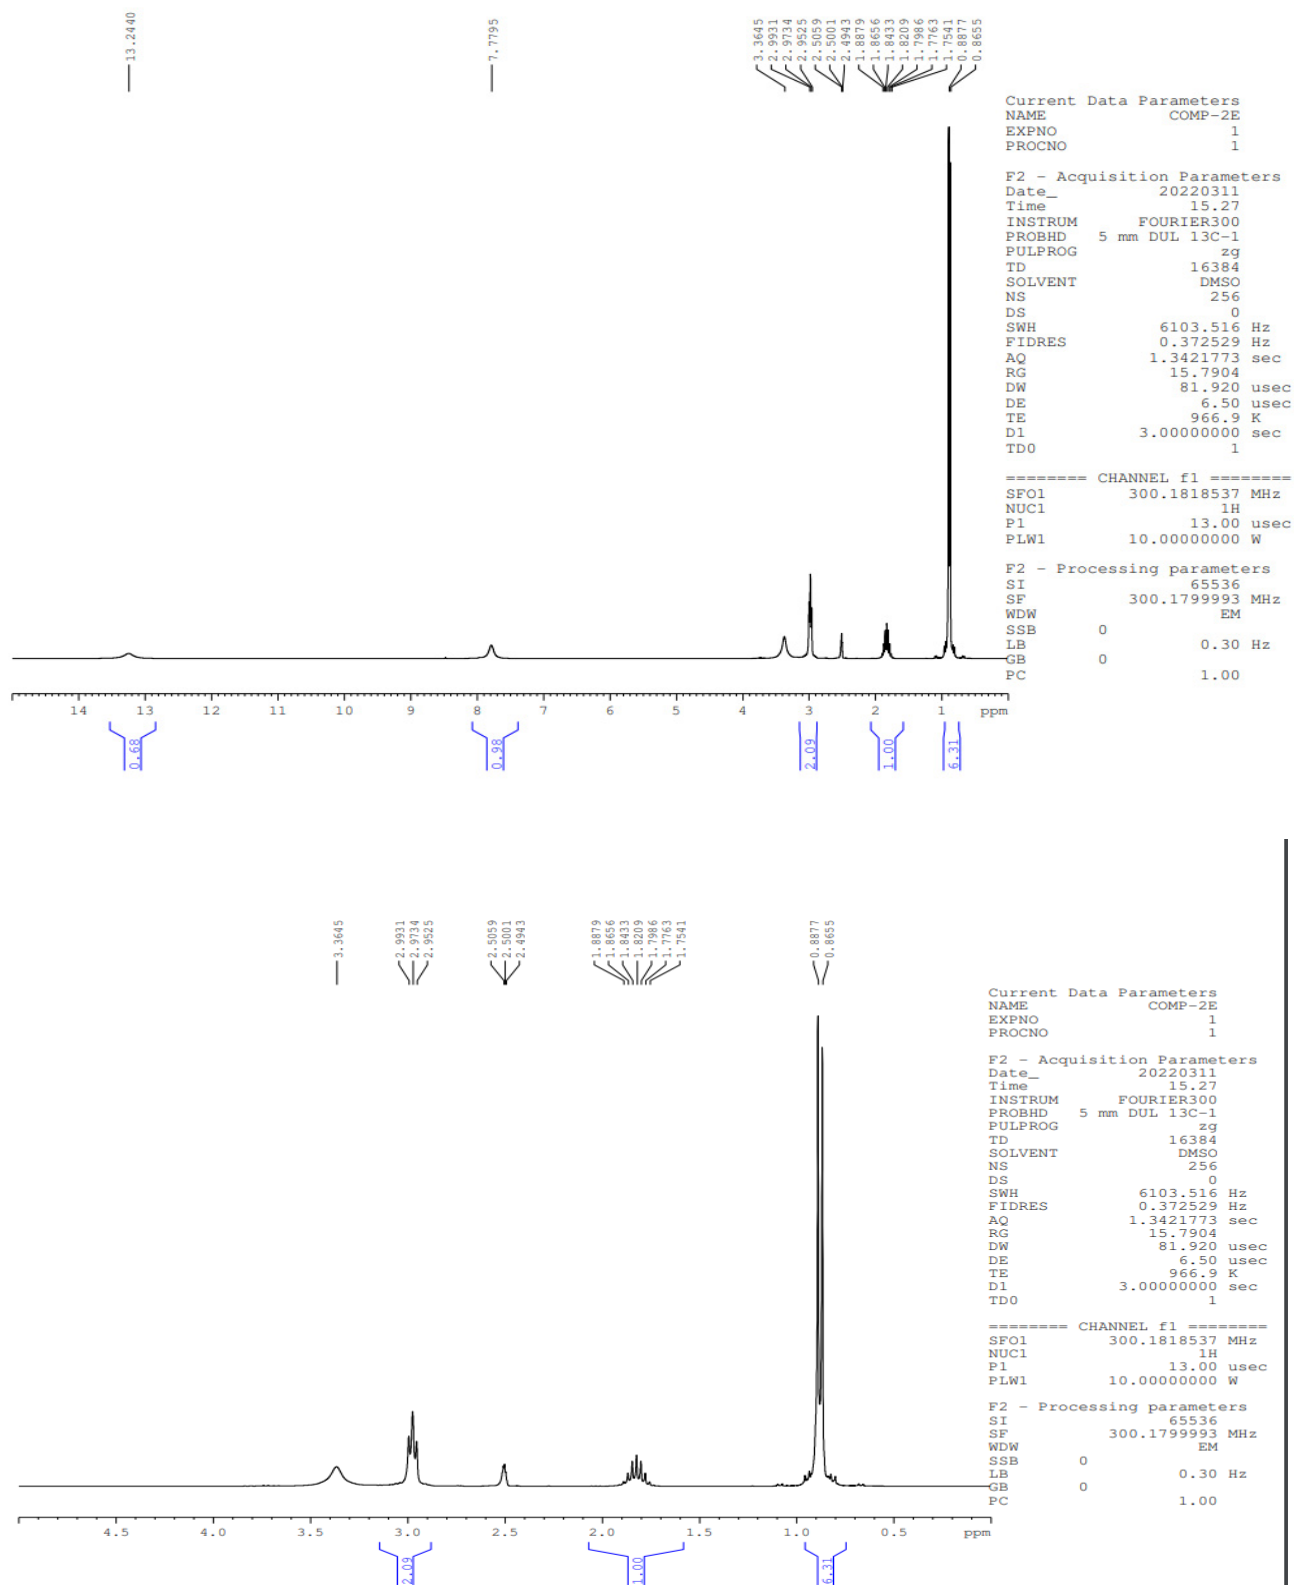

Figure S45.  $^1\text{H}$ NMR of 2f: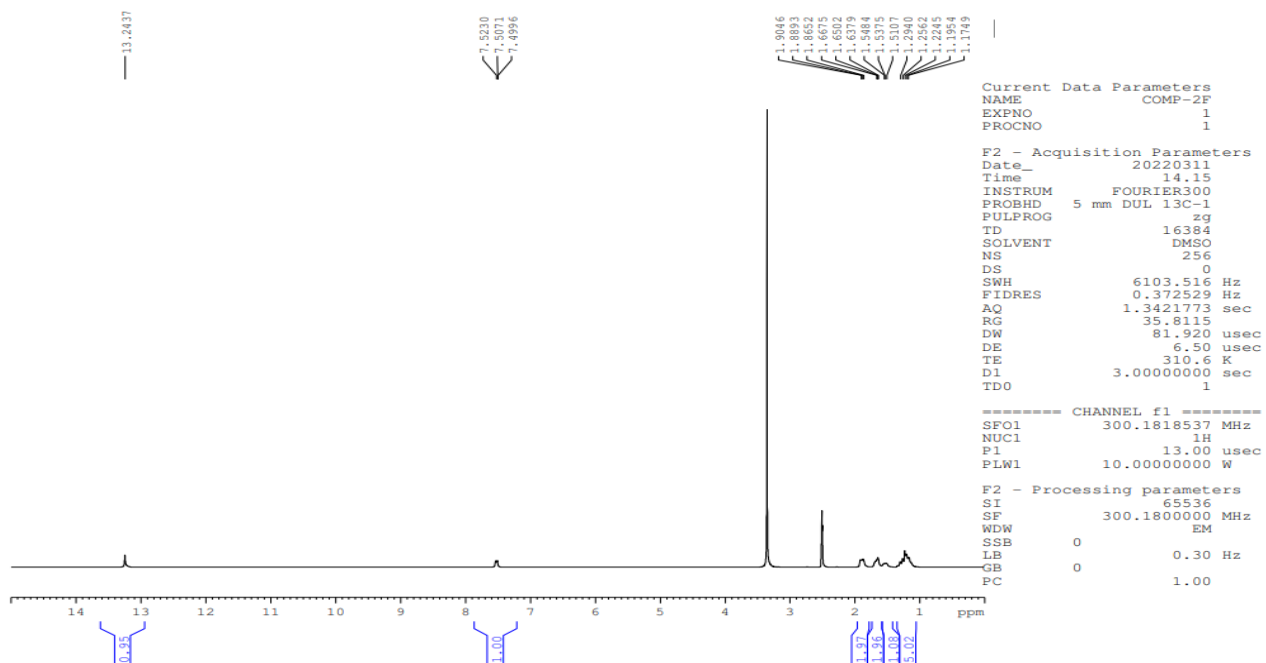Figure S46.  $^1\text{H}$ NMR of 2g: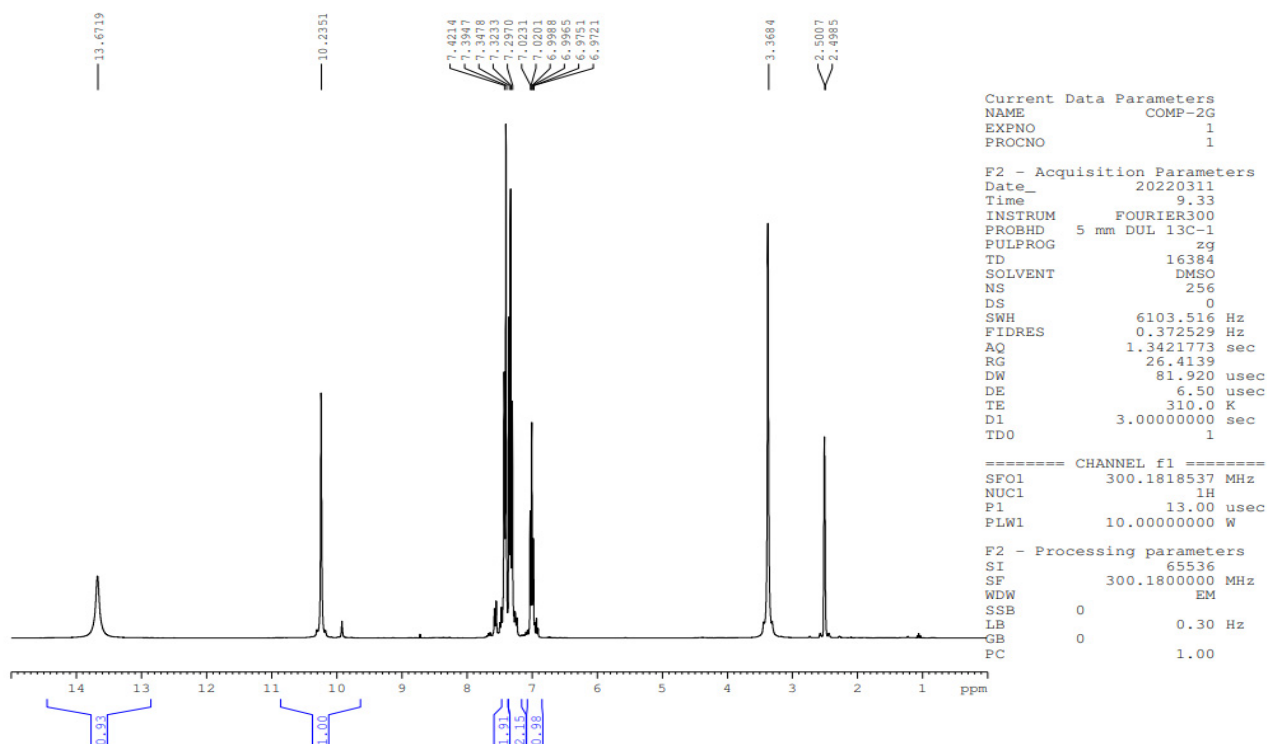

Figure S47. <sup>1</sup>HNMR of 2h: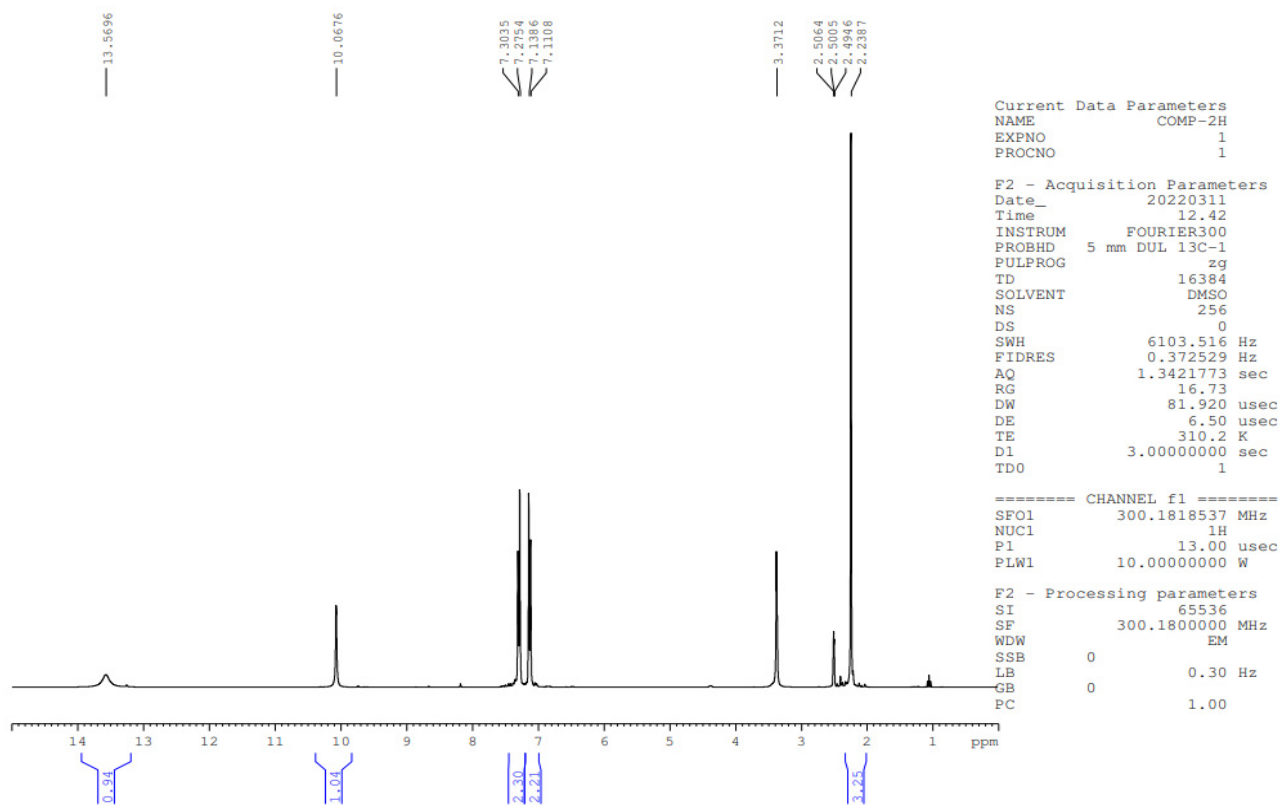Figure S48. <sup>1</sup>HNMR of 2i: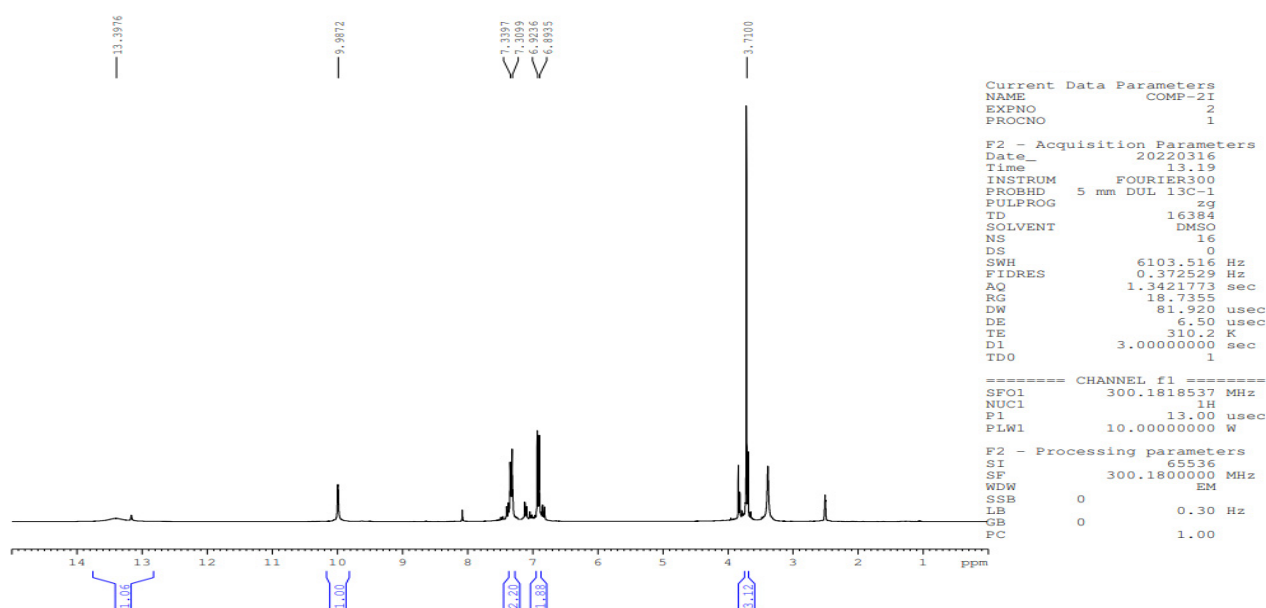

Figure S49. <sup>1</sup>H NMR of 2j: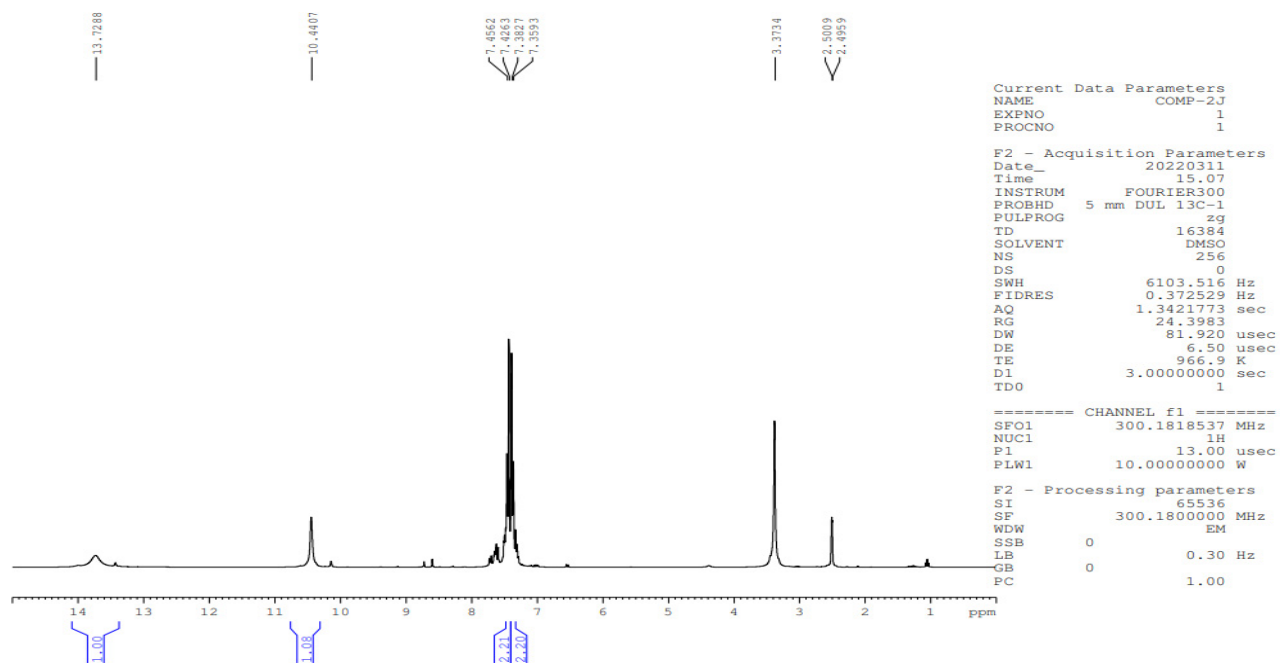

Supplement: Supplementary file 1 [file molecules-27-02121-s001.zip › molecules-1638141-supplementary.pdf]
